# Supplementary material for: Organotopic organization of the porcine mid-cervical vagus nerve
Source: Front Neurosci. 2023 May 2;17:963503. doi: 10.3389/fnins.2023.963503 (PMC10185768; doi:10.3389/fnins.2023.963503)
Supplement: SUPPLEMENTARY TABLE — Morphology Data and Analyses of Porcine Vagus Nerve. [file Table_1.XLSX]

## Sheet: Morphology Data per Nerve
	Analysis per nerve, per position and branch
	NERVE 1
	SS cuff
	Contour Name	Fascicle Count	Area (µm²)	Area (mm²)	Perimeter (µm)	Perimeter (mm)	Z position (µm)	Z plane	Feret Min (µm)	Feret Min (mm)	Feret Max (µm)	Feret Max (mm)	Aspect Ratio	Compactness	Shape Factor	Form Factor	Roundness	Convexity	Solidity	Area error coeff.	Perimeter error coef
	Cardiac Fascicle		65918.3	0.0659183	990.021	0.990021	-7000	1001	222.495	0.222495	380.413	0.380413	0.5849	0.7616	3.86	0.85	0.58	0.9958	0.9836	5101.52	50.1185
	Cardiac Fascicle		55136.5	0.0551365	871.713	0.871713	-7000	1001	229.21	0.22921	324.677	0.324677	0.706	0.8161	3.71	0.91	0.666	0.9996	0.9967	4491.88	49.0189
	Mean Cardiac Fascicle	2	60527.4	0.0605274	930.867	0.930867	-7000	1001	225.853	0.225853	352.545	0.352545	0.64545	0.78885	3.785	0.88	0.623	0.9977	0.99015	4796.7	49.5687
	Standard Deviation		7623.88	0.00762388	83.6563	0.0836563	0	0	4.74849	0.00474849	39.4119	0.0394119	0.0856306	0.0385373	0.106066	0.0424264	0.0608112	0.00268701	0.0092631	431.076	0.777535
	Recurrent Laryngeal Fascicle		22490.2	0.0224902	559.519	0.559519	-7000	1001	141.641	0.141641	200.697	0.200697	0.7057	0.8432	3.73	0.9	0.7109	1	1	2883.17	30.0939
	Recurrent Laryngeal Fascicle		40465.8	0.0404658	736.396	0.736396	-7000	1001	221.127	0.221127	241.965	0.241965	0.9139	0.9381	3.66	0.94	0.88	0.9917	0.9902	3794.61	61.0442
	Recurrent Laryngeal Fascicle		26526.6	0.0265266	632.366	0.632366	-7000	1001	162.335	0.162335	243.233	0.243233	0.6674	0.7556	3.88	0.83	0.5709	0.9797	0.9689	3258.54	64.4805
	Recurrent Laryngeal Fascicle		17285.2	0.0172852	491.616	0.491616	-7000	1001	133.97	0.13397	185.79	0.18579	0.7211	0.7985	3.74	0.9	0.6376	0.9993	0.9939	2533.27	27.1156
	Recurrent Laryngeal Fascicle		13342.8	0.0133428	431.408	0.431408	-7000	1001	113.36	0.11336	145.108	0.145108	0.7812	0.8982	3.73	0.9	0.8068	1	0.9999	2223.02	20.8096
	Recurrent Laryngeal Fascicle		40055	0.040055	735.143	0.735143	-7000	1001	203.037	0.203037	260.721	0.260721	0.7788	0.8662	3.67	0.93	0.7503	0.9982	0.996	3788.15	52.2255
	Recurrent Laryngeal Fascicle		33948.1	0.0339481	688.557	0.688557	-7000	1001	182.179	0.182179	248.681	0.248681	0.7326	0.836	3.74	0.9	0.6989	0.9972	0.9961	3548.09	22.993
	Recurrent Laryngeal Fascicle		14059.7	0.0140597	458.655	0.458655	-7000	1001	121.821	0.121821	182.332	0.182332	0.6681	0.7338	3.87	0.84	0.5385	1	1	2363.42	24.3378
	Recurrent Laryngeal Fascicle		43943.9	0.0439439	762.94	0.76294	-7000	1001	214.615	0.214615	262.395	0.262395	0.8179	0.9015	3.64	0.95	0.8126	0.9991	0.9958	3931.38	73.8204
	Recurrent Laryngeal Fascicle		16330.4	0.0163304	487.827	0.487827	-7000	1001	118.598	0.118598	194.457	0.194457	0.6099	0.7415	3.82	0.86	0.5499	0.9997	0.9969	2513.74	30.0784
	Recurrent Laryngeal Fascicle		23207.8	0.0232078	563.842	0.563842	-7000	1001	154.589	0.154589	200.508	0.200508	0.771	0.8573	3.7	0.92	0.735	0.998	0.9882	2905.45	55.3387
	Recurrent Laryngeal Fascicle		16078.1	0.0160781	474.12	0.47412	-7000	1001	131.465	0.131465	172.227	0.172227	0.7633	0.8308	3.74	0.9	0.6901	0.999	0.9917	2443.11	33.4696
	Recurrent Laryngeal Fascicle		13462.1	0.0134621	442.006	0.442006	-7000	1001	110.248	0.110248	164.328	0.164328	0.6709	0.7967	3.81	0.87	0.6347	0.9922	0.9923	2277.63	36.1811
	Mean Recurrent Laryngeal Fascicle	13	24707.4	0.0247074	574.184	0.574184	-7000	1001	154.537	0.154537	207.88	0.20788	0.7386	0.830569	3.74846	0.895385	0.693554	0.996469	0.993069	2958.74	40.9222
	Standard Deviation		11249.1	0.0112491	122.518	0.122518	0	0	39.1167	0.0391167	39.1315	0.0391315	0.0789095	0.0635313	0.0763595	0.036655	0.105418	0.00575346	0.00817459	631.329	17.9867
	Pulmonary Fascicle		64150.8	0.0641508	920.133	0.920133	-7000	1001	273.909	0.273909	308.874	0.308874	0.8868	0.9253	3.63	0.95	0.8561	0.9979	0.993	4741.39	62.7613
	Pulmonary Fascicle		11470.9	0.0114709	403.768	0.403768	-7000	1001	102.959	0.102959	150.496	0.150496	0.6841	0.803	3.77	0.88	0.6448	1	1.0002	2080.59	20.7389
	Pulmonary Fascicle		68585.8	0.0685858	966.242	0.966242	-7000	1001	246.028	0.246028	342.19	0.34219	0.719	0.8636	3.69	0.92	0.7458	0.9964	0.996	4978.99	42.3883
	Pulmonary Fascicle		52255.6	0.0522556	851.526	0.851526	-7000	1001	222.309	0.222309	320.975	0.320975	0.6926	0.8036	3.73	0.91	0.6458	1	1	4387.86	54.2544
	Pulmonary Fascicle		34917.1	0.0349171	690.814	0.690814	-7000	1001	184.921	0.184921	239.542	0.239542	0.772	0.8802	3.7	0.92	0.7748	0.9928	0.994	3559.72	49.8482
	Pulmonary Fascicle		23074.1	0.0230741	561.746	0.561746	-7000	1001	165.534	0.165534	189.186	0.189186	0.875	0.906	3.7	0.92	0.8208	0.9928	0.9921	2894.64	32.4556
	Pulmonary Fascicle		15241.8	0.0152418	460.088	0.460088	-7000	1001	122.003	0.122003	162.957	0.162957	0.7487	0.8549	3.73	0.9	0.7308	1	1.0001	2370.8	30.3852
	Pulmonary Fascicle		33854.4	0.0338544	673.952	0.673952	-7000	1001	203.002	0.203002	226.017	0.226017	0.8982	0.9186	3.66	0.94	0.8438	0.9961	0.9895	3472.84	37.788
	Pulmonary Fascicle		49361.9	0.0493619	815.475	0.815475	-7000	1001	235.977	0.235977	281.722	0.281722	0.8376	0.8899	3.67	0.93	0.7919	0.9959	0.993	4202.1	62.0842
	Pulmonary Fascicle		14006.5	0.0140065	474.389	0.474389	-7000	1001	122.697	0.122697	175.047	0.175047	0.7009	0.7629	4.01	0.78	0.582	0.9804	0.953	2444.5	27.1467
	Pulmonary Fascicle		33549.1	0.0335491	699.458	0.699458	-7000	1001	159.74	0.15974	251.284	0.251284	0.6357	0.8225	3.82	0.86	0.6765	0.9965	0.9891	3604.26	52.2212
	Pulmonary Fascicle		63143.5	0.0631435	961.021	0.961021	-7000	1001	215.428	0.215428	356.902	0.356902	0.6036	0.7945	3.82	0.86	0.6312	0.9943	0.9944	4952.08	44.7863
	Mean Pulmonary Fascicle	12	38634.3	0.0386343	706.551	0.706551	-7000	1001	187.876	0.187876	250.433	0.250433	0.754517	0.852083	3.74417	0.8975	0.728692	0.995258	0.9912	3640.81	43.0715
	Standard Deviation		20550.9	0.0205509	199.851	0.199851	0	0	54.2456	0.0542456	71.931	0.071931	0.0998744	0.0539005	0.102554	0.0469284	0.0914733	0.0053272	0.0126225	1029.82	13.6887
	Merged Fascicle (P and RL)		27393.3	0.0273933	652.822	0.652822	-7000	1001	142.643	0.142643	265.762	0.265762	0.5367	0.7027	3.94	0.81	0.4938	0.9943	0.986	3205.74	48.7261
	Merged Fascicle (P and RL)		37894.9	0.0378949	721.438	0.721438	-7000	1001	190.676	0.190676	255.208	0.255208	0.7471	0.8607	3.71	0.91	0.7408	0.9915	0.9906	3542.68	63.7989
	Merged Fascicle (P and RL)		28972.8	0.0289728	631.022	0.631022	-7000	1001	176.781	0.176781	212.464	0.212464	0.8321	0.904	3.71	0.91	0.8172	0.9934	0.9877	3098.69	41.905
	Merged Fascicle (P and RL)		20328	0.020328	547.463	0.547463	-7000	1001	131.557	0.131557	202.468	0.202468	0.6498	0.7946	3.84	0.85	0.6314	0.9871	0.9836	2688.36	37.0225
	Mean Merged Fascicle	4	28647.2	0.0286473	638.186	0.638186	-7000	1001	160.414	0.160414	233.976	0.233976	0.691425	0.8155	3.8	0.87	0.6708	0.991575	0.986975	3133.87	47.8631
	Standard Deviation		7220.51	0.00722051	71.7102	0.0717102	0	0	27.8817	0.0278817	31.1804	0.0311804	0.127229	0.0876279	0.111654	0.0489898	0.140492	0.00320351	0.00294434	352.139	11.6578
	vagus nerve		4193720	4.19372	10601.7	10.6017	-7000	1001	1815.69	1.81569	3892.98	3.89298	0.4664	0.5936	5.18	0.47	0.3523	0.9057	0.7423	52060.5	523.548
	EIT cuff
	Contour Name	Fascicle Count	Area (µm²)	Area (mm²)	Perimeter (µm)	Perimeter (mm)	Z position (µm)	Z plane	Feret Min (µm)	Feret Min (mm)	Feret Max (µm)	Feret Max (mm)	Aspect Ratio	Compactness	Shape Factor	Form Factor	Roundness	Convexity	Solidity	Area error coeff.	Perimeter error coef
	Cardiac Fascicle		93496.1	0.0934961	1111.71	1.11171	-1302	187	304.966	0.304966	384.206	0.384206	0.7938	0.898	3.64	0.95	0.8064	0.9982	0.9959	4477.99	81.8146
	Mean Cardiac Fascicle	1	93496.1	0.0934961	1111.71	1.11171	-1302	187	304.966	0.304966	384.206	0.384206	0.7938	0.898	3.64	0.95	0.8064	0.9982	0.9959	4477.99	81.8146
	Recurrent Laryngeal Fascicle		11179	0.011179	400.357	0.400357	-1302	187	100.7	0.1007	153.383	0.153383	0.6565	0.7778	3.79	0.88	0.605	0.9991	0.9971	1612.64	25.8541
	Recurrent Laryngeal Fascicle		22025.3	0.0220253	550.073	0.550073	-1302	187	149.701	0.149701	203.205	0.203205	0.7367	0.8241	3.71	0.91	0.6791	0.9975	0.9964	2215.7	47.4071
	Recurrent Laryngeal Fascicle		18001.6	0.0180016	488.654	0.488654	-1302	187	136.772	0.136772	168.07	0.16807	0.8138	0.9008	3.64	0.95	0.8114	0.9999	0.9985	1968.31	48.4539
	Recurrent Laryngeal Fascicle		18309.8	0.0183098	494.664	0.494664	-1302	187	144.339	0.144339	171.368	0.171368	0.8423	0.891	3.66	0.94	0.7938	0.9999	0.9992	1992.52	30.3131
	Recurrent Laryngeal Fascicle		14634.9	0.0146349	453.511	0.453511	-1302	187	134.696	0.134696	154.226	0.154226	0.8734	0.8851	3.75	0.89	0.7834	0.9994	0.9918	1826.75	29.0852
	Recurrent Laryngeal Fascicle		11381.8	0.0113818	421.595	0.421595	-1302	187	102.166	0.102166	155.014	0.155014	0.6591	0.7766	3.95	0.8	0.6031	0.968	0.9771	1698.19	36.6412
	Recurrent Laryngeal Fascicle		17531	0.017531	513.879	0.513879	-1302	187	125.381	0.125381	205.784	0.205784	0.6093	0.726	3.88	0.83	0.5271	0.9976	0.9877	2069.91	43.393
	Recurrent Laryngeal Fascicle		60778.6	0.0607786	901.384	0.901384	-1302	187	265.315	0.265315	298.318	0.298318	0.8894	0.9325	3.66	0.94	0.8696	0.9933	0.9882	3630.79	51.0814
	Recurrent Laryngeal Fascicle		64705	0.064705	931.254	0.931254	-1302	187	252.388	0.252388	335.198	0.335198	0.753	0.8563	3.66	0.94	0.7332	0.9967	0.994	3751.11	79.688
	Recurrent Laryngeal Fascicle		26706.2	0.0267062	622.863	0.622863	-1302	187	151.935	0.151935	242.117	0.242117	0.6275	0.7616	3.81	0.87	0.5801	0.9954	0.9904	2508.9	57.2532
	Recurrent Laryngeal Fascicle		12095.6	0.0120956	407.905	0.407905	-1302	187	122.695	0.122695	136.952	0.136952	0.8959	0.9061	3.71	0.91	0.8211	0.9951	0.9862	1643.05	21.7292
	Recurrent Laryngeal Fascicle		57793.2	0.0577932	876.23	0.87623	-1302	187	246.502	0.246502	308.347	0.308347	0.7994	0.8797	3.64	0.95	0.7739	0.9971	0.9964	3529.47	68.2506
	Mean Recurrent Laryngeal Fascicle	12	27928.5	0.0279285	588.531	0.588531	-1302	187	161.049	0.161049	210.999	0.210999	0.763025	0.843133	3.73833	0.900833	0.715067	0.994917	0.991917	2370.61	44.9292
	Standard Deviation		20540	0.02054	199.831	0.199831	0	0	58.8864	0.0588864	68.8585	0.0688585	0.104853	0.0675983	0.10098	0.0488892	0.112231	0.00872028	0.0064238	804.922	17.5762
	Pulmonary Fascicle		47676.9	0.0476769	787.008	0.787008	-1302	187	229.279	0.229279	270.208	0.270208	0.8485	0.9118	3.6	0.97	0.8314	0.9992	0.9956	3170.08	66.9521
	Pulmonary Fascicle		15786.9	0.0157869	460.967	0.460967	-1302	187	128.897	0.128896	161.121	0.161121	0.8	0.8799	3.67	0.93	0.7743	1	1	1856.78	29.4154
	Pulmonary Fascicle		10546.2	0.0105462	389.645	0.389645	-1302	187	104.119	0.104119	142.526	0.142526	0.7305	0.813	3.79	0.87	0.661	1	0.9999	1569.5	31.443
	Pulmonary Fascicle		8518.1	0.0085181	335.657	0.335657	-1302	187	100.019	0.100019	113.716	0.113716	0.8796	0.9158	3.64	0.95	0.8387	0.9996	0.998	1352.03	28.4377
	Pulmonary Fascicle		19697	0.019697	512.704	0.512704	-1302	187	144.918	0.144918	183.75	0.18375	0.7887	0.8618	3.65	0.94	0.7428	0.9992	0.998	2065.18	33.5849
	Pulmonary Fascicle		13426.1	0.0134261	428.349	0.428349	-1302	187	116.002	0.116002	149.851	0.149851	0.7741	0.8725	3.7	0.92	0.7613	0.9991	0.997	1725.4	30.0751
	Pulmonary Fascicle		84515.6	0.0845156	1051.64	1.05164	-1302	187	301.799	0.301799	366.549	0.366549	0.8234	0.8949	3.62	0.96	0.8009	0.9984	0.9965	4236.02	93.4634
	Pulmonary Fascicle		20646.2	0.0206462	530.724	0.530724	-1302	187	155.027	0.155027	174.883	0.174883	0.8865	0.9271	3.69	0.92	0.8595	0.9989	0.9875	2137.77	35.9217
	Pulmonary Fascicle		22869	0.022869	554.016	0.554016	-1302	187	159.187	0.159187	201.401	0.201401	0.7904	0.8473	3.66	0.94	0.7179	0.999	0.9964	2231.59	43.8259
	Pulmonary Fascicle		28158.4	0.0281584	619.578	0.619578	-1302	187	154.345	0.154345	215.903	0.215903	0.7149	0.877	3.69	0.92	0.7691	0.9997	0.9984	2495.67	52.89
	Pulmonary Fascicle		29675.4	0.0296754	628.05	0.62805	-1302	187	180.875	0.180875	216.766	0.216766	0.8344	0.8967	3.65	0.95	0.8041	1	1	2529.79	37.9983
	Pulmonary Fascicle		31062.6	0.0310626	639.216	0.639216	-1302	187	179.345	0.179345	219.148	0.219148	0.8184	0.9075	3.63	0.96	0.8235	1	1	2574.77	44.3953
	Pulmonary Fascicle		20410.9	0.0204109	532.22	0.53222	-1302	187	139.07	0.13907	196.384	0.196384	0.7082	0.8209	3.73	0.91	0.6738	0.9958	0.9913	2143.79	43.6018
	Pulmonary Fascicle		15308.2	0.0153082	493.665	0.493665	-1302	187	113.628	0.113628	196.673	0.196673	0.5778	0.7099	3.99	0.79	0.5039	0.993	0.9506	1988.49	39.4416
	Pulmonary Fascicle		9921.56	0.00992156	377.974	0.377974	-1302	187	90.4301	0.0904301	145.232	0.145232	0.6227	0.7739	3.79	0.87	0.5989	0.9992	0.9992	1522.48	31.9516
	Pulmonary Fascicle		2733.89	0.00273389	210.183	0.210183	-1302	187	49.6964	0.0496964	86.2032	0.0862032	0.5765	0.6844	4.02	0.78	0.4684	0.9923	0.9822	846.622	18.721
	Pulmonary Fascicle		68858.5	0.0688585	1055.43	1.05543	-1302	187	277.385	0.277385	342.76	0.34276	0.8093	0.8639	4.02	0.78	0.7463	0.9488	0.9345	4251.3	86.3743
	Mean Pulmonary Fascicle	17	26459.5	0.0264595	565.119	0.565119	-1302	187	154.354	0.154354	199.004	0.199004	0.763759	0.850488	3.73765	0.903529	0.727988	0.995424	0.989712	2276.31	44.029
	Standard Deviation		21796.6	0.0217966	226.799	0.226799	0	0	65.411	0.065411	73.1339	0.0731339	0.0962253	0.0703206	0.140202	0.063732	0.113954	0.0122451	0.0186158	913.549	20.4169
	Merged Fascicle (P and RL)		29085.3	0.0290853	632.011	0.632011	-1302	187	166.145	0.166145	221.907	0.221907	0.7487	0.8672	3.71	0.92	0.752	0.9923	0.9877	2483.91	55.4273
	Merged Fascicle (P and RL)		10665.6	0.0106656	405.834	0.405834	-1302	187	87.2444	0.0872444	163.61	0.16361	0.5332	0.7123	3.93	0.81	0.5073	0.9991	0.9957	1595	22.7497
	Merged Fascicle (P and RL)		18798.1	0.0187981	508.895	0.508895	-1302	187	132.054	0.132054	180.831	0.180831	0.7303	0.8555	3.71	0.91	0.7319	0.9986	0.9905	2000.04	36.0032
	Merged Fascicle (P and RL)		10951.4	0.0109514	390.244	0.390244	-1302	187	107.413	0.107413	143.06	0.14306	0.7508	0.8254	3.73	0.9	0.6813	0.9939	0.988	1533.73	38.277
	Mean Merged Fascicle	4	17375.1	0.0173751	484.246	0.484246	-1302	187	123.214	0.123214	177.352	0.177352	0.69075	0.8151	3.77	0.885	0.668125	0.995975	0.990475	1903.17	38.1143
	Standard Deviation		8668.62	0.00866862	111.694	0.111694	0	0	33.9837	0.0339837	33.4763	0.0334763	0.105436	0.070759	0.107083	0.0506623	0.111266	0.00338957	0.00370259	438.977	13.4201
	vagus nerve		3137500	3.1375	6648.47	6.64847	-1302	187	1765.09	1.76509	2445.01	2.44501	0.7219	0.8175	3.75	0.89	0.6682	0.9929	0.9889	26129.6	384.147
	Superior cardiac
	Contour Name	Fascicle Count	Area (µm²)	Area (mm²)	Perimeter (µm)	Perimeter (mm)	Z position (µm)	Z plane	Feret Min (µm)	Feret Min (mm)	Feret Max (µm)	Feret Max (mm)	Aspect Ratio	Compactness	Shape Factor	Form Factor	Roundness	Convexity	Solidity	Area error coeff.	Perimeter error coef
	Cardiac Branch		315484	0.315484	2165.05	2.16505	-8771	1254	483.012	0.483012	852.925	0.852925	0.5663	0.7431	3.85	0.85	0.5522	0.9916	0.986	4350.13	101.854
	Cardiac Fascicle		36898.9	0.0368989	701.503	0.701503	-8771	1254	196.906	0.196906	249.616	0.249616	0.7888	0.8683	3.65	0.94	0.754	0.9962	0.9948	1409.49	58.3195
	Mean Cardiac Fascicle	1	36898.9	0.0368989	701.503	0.701503	-8771	1254	196.906	0.196906	249.616	0.249616	0.7888	0.8683	3.65	0.94	0.754	0.9962	0.9948	1409.49	58.3195
	Inferior cardiac
	Contour Name	Fascicle Count	Area (µm²)	Area (mm²)	Perimeter (µm)	Perimeter (mm)	Z position (µm)	Z plane	Feret Min (µm)	Feret Min (mm)	Feret Max (µm)	Feret Max (mm)	Aspect Ratio	Compactness	Shape Factor	Form Factor	Roundness	Convexity	Solidity	Area error coeff.	Perimeter error coef
	Cardiac Branch		155191	0.155191	1529.78	1.52978	-5817	832	369.825	0.369825	615.547	0.615547	0.6008	0.7221	3.88	0.83	0.5215	0.994	0.9808	4396.13	101.971
	Cardiac Fascicle		38829.6	0.0388296	717.398	0.717398	-5817	832	198.69	0.19869	244.179	0.244179	0.8137	0.9106	3.64	0.95	0.8292	0.9963	0.9915	2061.58	56.7843
	Mean Cardiac Fascicle	1	38829.6	0.0388296	717.398	0.717398	-5817	832	198.69	0.19869	244.179	0.244179	0.8137	0.9106	3.64	0.95	0.8292	0.9963	0.9915	2061.58	56.7843
	Recurrent laryngeal
	Contour Name	Fascicle Count	Area (µm²)	Area (mm²)	Perimeter (µm)	Perimeter (mm)	Z position (µm)	Z plane	Feret Min (µm)	Feret Min (mm)	Feret Max (µm)	Feret Max (mm)	Aspect Ratio	Compactness	Shape Factor	Form Factor	Roundness	Convexity	Solidity	Area error coeff.	Perimeter error coef
	Recurrent Laryngeal Branch		206645	0.206645	1700.59	1.70059	-8400	1201	428.457	0.428457	666.528	0.666528	0.6428	0.7696	3.74	0.9	0.5922	0.9983	0.9962	5718.41	94.1199
	Recurrent Laryngeal Fascicle		9661.83	0.00966183	388.043	0.388043	-8400	1201	78.6604	0.0786604	147.493	0.147493	0.5333	0.752	3.95	0.81	0.5655	0.9991	0.989	1304.84	27.387
	Recurrent Laryngeal Fascicle		23281.2	0.0232812	594.855	0.594855	-8400	1201	133.148	0.133148	224.771	0.224771	0.5924	0.766	3.9	0.83	0.5867	0.9795	0.9722	2000.27	42.326
	Mean Recurrent Laryngeal Fascicle	2	16471.5	0.0164715	491.449	0.491449	-8400	1201	105.904	0.105904	186.132	0.186132	0.56285	0.759	3.925	0.82	0.5761	0.9893	0.9806	1652.55	34.8565
	Standard Deviation		9630.35	0.00963035	146.238	0.146238	0	0	38.5287	0.0385287	54.6437	0.0546437	0.04179	0.00989949	0.0353553	0.0141421	0.0149907	0.0138593	0.0118794	491.743	10.5635
	Pulmonary
	Contour Name	Fascicle Count	Area (µm²)	Area (mm²)	Perimeter (µm)	Perimeter (mm)	Z position (µm)	Z plane	Feret Min (µm)	Feret Min (mm)	Feret Max (µm)	Feret Max (mm)	Aspect Ratio	Compactness	Shape Factor	Form Factor	Roundness	Convexity	Solidity	Area error coeff.	Perimeter error coef
	Pulmonary Branch		352463	0.352463	2239.34	2.23934	-13300	1901	648.435	0.648435	764.165	0.764165	0.8486	0.8766	3.77	0.88	0.7685	0.9894	0.9632	7402.89	129.581
	Pulmonary Fascicle		3152.92	0.00315292	216.991	0.216991	-13300	1901	51.8273	0.0518273	81.4561	0.0814561	0.6363	0.7778	3.86	0.84	0.605	0.9958	0.9745	535.86	19.6021
	Pulmonary Fascicle		9937.45	0.00993745	371.045	0.371045	-13300	1901	96.4198	0.0964198	139.434	0.139434	0.6915	0.8067	3.72	0.91	0.6508	0.9997	0.9977	916.298	26.6037
	Pulmonary Fascicle		4381.73	0.00438173	253.604	0.253604	-13300	1901	58.2075	0.0582075	95.3878	0.0953878	0.6102	0.783	3.83	0.86	0.6132	1	0.9999	626.277	15.2555
	Mean Pulmonary Fascicle	3	5824.03	0.00582403	280.547	0.280547	-13300	1901	68.8182	0.0688182	105.426	0.105426	0.646	0.789167	3.80333	0.87	0.623	0.9985	0.9907	692.812	20.4871
	Standard Deviation		3614.92	0.00361492	80.4835	0.0804835	0	0	24.1156	0.0241156	30.2644	0.0302644	0.0415089	0.0154053	0.0737111	0.0360555	0.0244221	0.00234307	0.0140727	198.755	5.72563
	NERVE 2
	SS cuff
	Contour Name	Fascicle Count	Area (µm²)	Area (mm²)	Perimeter (µm)	Perimeter (mm)	Z position (µm)	Z plane	Feret Min (µm)	Feret Min (mm)	Feret Max (µm)	Feret Max (mm)	Aspect Ratio	Compactness	Shape Factor	Form Factor	Roundness	Convexity	Solidity	Area error coeff.	Perimeter error coef
	Pulmonary Fascicle		32899.7	0.0328997	663.044	0.663044	-10500	1501	193.95	0.19395	226.552	0.226552	0.8561	0.9034	3.66	0.94	0.8161	0.9981	0.9965	2074.14	41.6012
	Pulmonary Fascicle		21454.4	0.0214544	528.755	0.528755	-10500	1501	157.479	0.157479	178.749	0.178749	0.881	0.9246	3.61	0.96	0.8549	1	1	1654.06	27.6545
	Pulmonary Fascicle		30286.2	0.0302862	637.459	0.637459	-10500	1501	185.025	0.185025	216.658	0.216658	0.854	0.9064	3.66	0.94	0.8215	0.9998	0.9987	1994.11	25.8822
	Pulmonary Fascicle		12129.2	0.0121292	402.929	0.402929	-10500	1501	110.601	0.110601	146.892	0.146892	0.7529	0.846	3.66	0.94	0.7157	1	0.9992	1260.45	25.5931
	Pulmonary Fascicle		9928.04	0.00992804	377.329	0.377329	-10500	1501	96.1245	0.0961245	135.1	0.1351	0.7115	0.8322	3.79	0.88	0.6926	0.9984	0.9878	1180.36	19.9962
	Pulmonary Fascicle		18940.4	0.0189404	499.965	0.499965	-10500	1501	137.64	0.13764	170.885	0.170885	0.8055	0.9088	3.63	0.95	0.8258	0.9993	0.9964	1564	29.9318
	Pulmonary Fascicle		35503	0.035503	678.89	0.67889	-10500	1501	205.425	0.205425	231.257	0.231257	0.8883	0.9194	3.6	0.97	0.8452	0.9993	0.9979	2123.71	46.931
	Pulmonary Fascicle		17555.6	0.0175556	496.685	0.496685	-10500	1501	141.241	0.141241	177.067	0.177067	0.7977	0.8444	3.75	0.89	0.7129	0.9965	0.9729	1553.74	28.1507
	Pulmonary Fascicle		28847.3	0.0288473	620.27	0.62027	-10500	1501	176.954	0.176954	213.542	0.213542	0.8287	0.8975	3.65	0.94	0.8055	0.9995	0.998	1940.33	29.3435
	Pulmonary Fascicle		15490.2	0.0154902	485.226	0.485226	-10500	1501	121.814	0.121814	184.56	0.18456	0.66	0.7609	3.9	0.83	0.579	0.996	0.99	1517.89	35.8627
	Pulmonary Fascicle		15397.5	0.0153975	514.121	0.514121	-10500	1501	109.48	0.10948	203.931	0.203931	0.5368	0.6866	4.14	0.73	0.4714	0.9834	0.9651	1608.28	32.1571
	Pulmonary Fascicle		37680.1	0.0376801	706.657	0.706657	-10500	1501	197.921	0.197921	252.306	0.252306	0.7844	0.8681	3.64	0.95	0.7536	0.9996	0.9979	2210.57	34.1679
	Pulmonary Fascicle		13915.5	0.0139155	430.223	0.430223	-10500	1501	117.836	0.117836	151.19	0.15119	0.7794	0.8804	3.65	0.94	0.7751	1	1	1345.83	19.9806
	Pulmonary Fascicle		11556.7	0.0115567	404.378	0.404378	-10500	1501	105.051	0.105051	156.414	0.156414	0.6716	0.7755	3.76	0.89	0.6014	1	1	1264.98	19.4167
	Pulmonary Fascicle		18978.6	0.0189786	501.375	0.501375	-10500	1501	143.213	0.143213	171.786	0.171786	0.8337	0.9049	3.64	0.95	0.8188	0.9993	0.9979	1568.41	25.3173
	Pulmonary Fascicle		12521	0.012521	409.315	0.409315	-10500	1501	121.373	0.121373	137.105	0.137105	0.8853	0.9209	3.66	0.94	0.8481	0.9999	0.9993	1280.42	24.5862
	Pulmonary Fascicle		26655.8	0.0266558	639.526	0.639526	-10500	1501	134.968	0.134968	248.389	0.248389	0.5434	0.7417	3.92	0.82	0.5501	0.9955	0.9893	2000.57	37.1824
	Pulmonary Fascicle		14473.5	0.0144735	447.741	0.447741	-10500	1501	116.587	0.116587	161.466	0.161466	0.7221	0.8407	3.72	0.91	0.7068	1	0.9994	1400.63	26.8531
	Pulmonary Fascicle		16200.7	0.0162007	470.475	0.470475	-10500	1501	128.01	0.12801	166.533	0.166533	0.7687	0.8624	3.7	0.92	0.7438	0.9991	0.9979	1471.75	21.9379
	Pulmonary Fascicle		6894.09	0.00689409	313.089	0.313089	-10500	1501	83.2947	0.0832947	115.407	0.115407	0.7217	0.8118	3.77	0.88	0.6591	0.9955	0.9847	979.408	23.4833
	Pulmonary Fascicle		20216.4	0.0202164	578.61	0.57861	-10500	1501	122.214	0.122214	216.571	0.216571	0.5643	0.7408	4.07	0.76	0.5488	0.9743	0.9391	1810.01	23.9009
	Pulmonary Fascicle		16009.5	0.0160095	461.651	0.461651	-10500	1501	129.953	0.129953	162.309	0.162309	0.8006	0.8796	3.65	0.94	0.7737	1	1	1444.14	18.0732
	Pulmonary Fascicle		32835.3	0.0328353	683.021	0.683021	-10500	1501	193.65	0.19365	243.363	0.243363	0.7957	0.8402	3.77	0.88	0.7059	0.9957	0.9888	2136.63	40.0196
	Pulmonary Fascicle		19249.1	0.0192491	504.214	0.504214	-10500	1501	146.538	0.146538	176.133	0.176133	0.832	0.8888	3.63	0.95	0.79	0.9999	0.9977	1577.29	29.8111
	Pulmonary Fascicle		25736	0.025736	583.972	0.583972	-10500	1501	175.56	0.17556	199.243	0.199243	0.8811	0.9085	3.64	0.95	0.8254	0.9981	0.9923	1826.79	29.7389
	Pulmonary Fascicle		8445.09	0.00844509	343.495	0.343495	-10500	1501	95.0899	0.0950899	123.275	0.123275	0.7714	0.8412	3.74	0.9	0.7076	0.9968	0.9795	1074.53	15.6064
	Mean Pulmonary Fascicle	26	19992.3	0.0199923	514.708	0.514708	-10500	1501	140.269	0.140269	183.334	0.183334	0.766458	0.851373	3.73115	0.905769	0.7288	0.997077	0.991012	1610.12	28.1992
	Standard Deviation		8698.43	0.00869843	110.943	0.110943	0	0	35.1701	0.0351701	38.9551	0.0389551	0.101889	0.0642665	0.137443	0.0610032	0.10558	0.00574075	0.0138829	347.052	7.63896
	Recurrent Laryngeal Fascicle		20980.8	0.0209808	525.742	0.525742	-10500	1501	155.883	0.155883	176.629	0.176629	0.8825	0.9253	3.63	0.95	0.8563	1	1	1644.63	23.7101
	Recurrent Laryngeal Fascicle		33456.4	0.0334564	689.977	0.689977	-10500	1501	190.335	0.190335	235.503	0.235503	0.8082	0.8764	3.77	0.88	0.7681	0.9994	0.9864	2158.39	35.0292
	Recurrent Laryngeal Fascicle		17231.6	0.0172316	481.964	0.481964	-10500	1501	134.51	0.13451	171.134	0.171134	0.786	0.8655	3.67	0.93	0.7491	0.9981	0.9972	1507.68	28.7835
	Recurrent Laryngeal Fascicle		16944.1	0.0169441	477.075	0.477075	-10500	1501	137.641	0.137641	162.339	0.162339	0.8479	0.9048	3.67	0.94	0.8186	0.999	0.9954	1492.39	24.3376
	Recurrent Laryngeal Fascicle		15535.1	0.0155351	455.711	0.455711	-10500	1501	125.13	0.12513	156.915	0.156915	0.7974	0.8963	3.66	0.94	0.8033	0.9984	0.9975	1425.56	26.5592
	Recurrent Laryngeal Fascicle		53625.8	0.0536258	862.005	0.862005	-10500	1501	213.189	0.213189	321.704	0.321704	0.6627	0.8122	3.72	0.91	0.6597	0.999	0.9953	2696.53	37.5499
	Recurrent Laryngeal Fascicle		12843.7	0.0128437	416.547	0.416547	-10500	1501	120.128	0.120128	146.629	0.146629	0.8193	0.8721	3.68	0.93	0.7606	1	0.9999	1303.05	17.433
	Recurrent Laryngeal Fascicle		6277.6	0.0062776	299.736	0.299736	-10500	1501	85.1662	0.0851662	107.637	0.107637	0.7912	0.8306	3.78	0.88	0.6899	0.9955	0.9847	937.636	14.3843
	Recurrent Laryngeal Fascicle		40112.3	0.0401123	732.835	0.732835	-10500	1501	217.541	0.217541	240.63	0.24063	0.904	0.9392	3.66	0.94	0.882	0.9933	0.99	2292.46	52.1596
	MeanRecurrent Laryngeal Fascicle	9	24111.9	0.0241119	549.066	0.549066	-10500	1501	153.28	0.15328	191.013	0.191013	0.811022	0.880267	3.69333	0.922222	0.7764	0.998078	0.994044	1717.59	28.8829
	Standard Deviation		15172	0.015172	176.858	0.176858	0	0	45.0364	0.0450364	64.2551	0.0642551	0.069277	0.0414723	0.0519615	0.0263523	0.0726333	0.00224765	0.0056699	553.248	11.4501
	Cardiac Fascicle		70447.8	0.0704478	1197.66	1.19766	-10500	1501	182.957	0.182957	506.201	0.506201	0.3614	0.5917	4.51	0.62	0.3501	0.9885	0.9309	3746.54	75.1555
	Mean Cardiac Fascicle	1	70447.8	0.0704478	1197.66	1.19766	-10500	1501	182.957	0.182957	506.201	0.506201	0.3614	0.5917	4.51	0.62	0.3501	0.9885	0.9309	3746.54	75.1555
	Merged Fascicle (P and RL)		46235.8	0.0462358	784.724	0.784724	-10500	1501	232.744	0.232744	258.229	0.258229	0.9013	0.9396	3.65	0.94	0.8828	0.9961	0.9896	4189.03	66.3727
	Merged Fascicle (P and RL)		12168.1	0.0121681	424.995	0.424995	-10500	1501	118.445	0.118445	155.176	0.155176	0.7633	0.8021	3.85	0.85	0.6434	0.9969	0.993	2268.72	30.2221
	Merged Fascicle (P and RL)		14519.1	0.0145191	454.79	0.45479	-10500	1501	119.552	0.119552	164.881	0.164881	0.7251	0.8246	3.77	0.88	0.68	0.989	0.978	2427.77	36.8824
	Merged Fascicle (P and RL)		33355.3	0.0333553	675.023	0.675023	-10500	1501	196.735	0.196735	223.059	0.223059	0.882	0.9239	3.7	0.92	0.8536	0.9919	0.9915	3603.42	51.7773
	Mean Merged Fascicle	4	26569.6	0.0265696	584.883	0.584883	-10500	1501	166.869	0.166869	200.336	0.200336	0.817925	0.87255	3.7425	0.8975	0.76495	0.993475	0.988025	3122.24	46.3136
	Standard Deviation		16180.5	0.0161805	173.733	0.173733	0	0	57.1993	0.0571993	48.8684	0.0488684	0.0869049	0.0692698	0.0869387	0.0403113	0.120745	0.00370259	0.0068266	927.428	16.1256
	vagus nerve		3561300	3.5613	8660.91	8.66091	-10500	1501	1817.66	1.81766	3434.62	3.43462	0.5292	0.62	4.59	0.6	0.3844	0.9851	0.8902	46233.9	344.373
	EIT cuff
	Contour Name	Fascicle Count	Area (µm²)	Area (mm²)	Perimeter (µm)	Perimeter (mm)	Z position (µm)	Z plane	Feret Min (µm)	Feret Min (mm)	Feret Max (µm)	Feret Max (mm)	Aspect Ratio	Compactness	Shape Factor	Form Factor	Roundness	Convexity	Solidity	Area error coeff.	Perimeter error coef
	Cardiac Fascicle		22381.5	0.0223815	560.492	0.560492	-7000	1001	135.614	0.135614	211.577	0.211577	0.641	0.7979	3.75	0.9	0.6366	0.9977	0.9923	2152.86	41.0023
	Cardiac Fascicle		45285.6	0.0452856	784.085	0.784085	-7000	1001	233.973	0.233973	261.224	0.261224	0.8957	0.9192	3.68	0.93	0.845	0.9906	0.9756	3011.68	70.9001
	Mean Cardiac Fascicle	2	33833.6	0.0338335	672.289	0.672289	-7000	1001	184.794	0.184794	236.401	0.236401	0.76835	0.85855	3.715	0.915	0.7408	0.99415	0.98395	2582.27	55.9512
	Standard Deviation		16195.6	0.0161956	158.104	0.158104	0	0	69.5499	0.0695499	35.1058	0.0351058	0.1801	0.0857721	0.0494975	0.0212132	0.147361	0.00502046	0.0118087	607.278	21.1409
	Pulmonary Fascicle		42627.8	0.0426278	753.09	0.75309	-7000	1001	213.818	0.213818	257.314	0.257314	0.831	0.9054	3.65	0.94	0.8197	0.9969	0.993	2797.79	42.4954
	Pulmonary Fascicle		37706.3	0.0377063	708.846	0.708846	-7000	1001	204.55	0.20455	250.928	0.250928	0.8152	0.8732	3.65	0.94	0.7625	0.9994	0.9943	2633.42	31.0532
	Pulmonary Fascicle		48596.1	0.0485961	897.769	0.897769	-7000	1001	194.623	0.194623	358.653	0.358653	0.5427	0.6936	4.07	0.76	0.481	0.9895	0.9784	3335.28	45.515
	Pulmonary Fascicle		38273	0.038273	725.346	0.725346	-7000	1001	191.045	0.191045	268.238	0.268238	0.7122	0.823	3.71	0.91	0.6773	1	0.9999	2694.72	38.3345
	Pulmonary Fascicle		30943.3	0.0309433	637.671	0.637671	-7000	1001	189.405	0.189405	212.67	0.21267	0.8906	0.9333	3.63	0.96	0.8711	0.9998	0.9992	2369	37.6064
	Pulmonary Fascicle		42765.3	0.0427653	761.929	0.761929	-7000	1001	207.942	0.207942	270.207	0.270207	0.7696	0.8636	3.68	0.93	0.7458	0.9977	0.9947	2830.62	30.4184
	Pulmonary Fascicle		18349.6	0.0183496	508.294	0.508294	-7000	1001	129.344	0.129344	179.555	0.179555	0.7204	0.8513	3.75	0.89	0.7247	0.9973	0.9864	1888.35	34.165
	Pulmonary Fascicle		26243.6	0.0262436	629.682	0.629682	-7000	1001	134.979	0.134979	252.739	0.252739	0.5341	0.7233	3.89	0.83	0.5231	1	1.0001	2339.32	29.8665
	Pulmonary Fascicle		24063	0.024063	568.065	0.568065	-7000	1001	152.686	0.152686	196.619	0.196619	0.7766	0.8902	3.66	0.94	0.7925	1	1	2110.41	23.6494
	Pulmonary Fascicle		23222	0.023222	551.27	0.55127	-7000	1001	162.703	0.162703	190.309	0.190309	0.8549	0.9035	3.62	0.96	0.8164	0.9999	0.9992	2048.01	39.1217
	Pulmonary Fascicle		9930.36	0.00993036	377.074	0.377074	-7000	1001	89.1606	0.0891606	142.194	0.142194	0.627	0.7908	3.78	0.88	0.6253	1	1.0008	1400.86	25.2288
	MeanPulmonary Fascicle	11	31156.4	0.0311564	647.185	0.647185	-7000	1001	170.023	0.170023	234.493	0.234493	0.734027	0.841018	3.73545	0.903636	0.712673	0.998227	0.995091	2404.34	34.314
	Standard Deviation		11899.8	0.0118998	143.246	0.143246	0	0	39.6819	0.0396819	58.6121	0.0586121	0.121198	0.0768579	0.136555	0.061526	0.124862	0.00313499	0.00705655	532.168	6.9599
	Recurrent Laryngeal Fascicle		36367.6	0.0363676	698.813	0.698813	-7000	1001	196.9	0.1969	245.078	0.245078	0.8034	0.878	3.66	0.94	0.7709	0.9974	0.9954	2596.14	36.1919
	Recurrent Laryngeal Fascicle		11779.1	0.0117791	405.569	0.405569	-7000	1001	118.16	0.11816	137.858	0.137858	0.8571	0.8883	3.74	0.9	0.7892	0.9919	0.9706	1506.72	25.7675
	Recurrent Laryngeal Fascicle		26554.5	0.0265545	614.241	0.614241	-7000	1001	160.355	0.160355	209.399	0.209399	0.7658	0.8781	3.77	0.88	0.7711	0.9922	0.9726	2281.95	29.0342
	Recurrent Laryngeal Fascicle		8391.32	0.00839132	340.365	0.340365	-7000	1001	96.7875	0.0967875	116.655	0.116655	0.8297	0.8861	3.72	0.91	0.7851	0.9974	0.9916	1264.48	20.6062
	Recurrent Laryngeal Fascicle		15478.3	0.0154783	464.347	0.464347	-7000	1001	124.066	0.124066	168.003	0.168003	0.7385	0.8356	3.73	0.9	0.6982	0.9994	0.9956	1725.08	22.172
	Recurrent Laryngeal Fascicle		13760.4	0.0137604	452.546	0.452546	-7000	1001	96.0208	0.0960208	169.44	0.16944	0.5667	0.7812	3.86	0.84	0.6103	0.999	0.9957	1681.24	21.2363
	Recurrent Laryngeal Fascicle		14139.7	0.0141397	448.1	0.4481	-7000	1001	115.17	0.11517	160.438	0.160438	0.7178	0.8363	3.77	0.88	0.6994	1	1.0001	1664.73	22.885
	Recurrent Laryngeal Fascicle		22717.6	0.0227176	570.278	0.570278	-7000	1001	126.31	0.12631	208.214	0.208214	0.6066	0.8168	3.78	0.88	0.6672	1	1.0002	2118.63	27.7263
	Recurrent Laryngeal Fascicle		18136	0.018136	496.658	0.496658	-7000	1001	133.728	0.133728	176.221	0.176221	0.7589	0.8623	3.69	0.92	0.7436	0.9986	0.9962	1845.12	40.5316
	Recurrent Laryngeal Fascicle		38340.6	0.0383406	712.242	0.712242	-7000	1001	207.397	0.207397	246.985	0.246985	0.8397	0.8946	3.64	0.95	0.8003	0.9991	0.9964	2646.04	36.9889
	Mean Recurrent Laryngeal Fascicle	10	20566.5	0.0205665	520.316	0.520316	-7000	1001	137.489	0.137489	183.829	0.183829	0.74842	0.85573	3.736	0.9	0.73353	0.9975	0.99144	1933.01	28.314
	Standard Deviation		10279.2	0.0102792	124.304	0.124304	0	0	38.7399	0.0387399	43.0463	0.0430463	0.0968134	0.0370983	0.0641526	0.0323179	0.0624719	0.00301109	0.0107466	461.8	7.23138
	Merged Fascicle (P and RL)		31011.9	0.0310119	735.152	0.735152	-7000	1001	159.156	0.159156	261.168	0.261168	0.6094	0.7609	4.17	0.72	0.5789	0.9198	0.9721	3252.34	61.9146
	Merged Fascicle (P and RL)		6321.8	0.0063218	337.745	0.337745	-7000	1001	66.3289	0.0663289	146.06	0.14606	0.4541	0.6142	4.25	0.7	0.3773	0.9924	0.9826	1494.2	32.9187
	Merged Fascicle (P and RL)		26167.9	0.0261679	603.484	0.603484	-7000	1001	163.747	0.163747	231.576	0.231576	0.7071	0.7882	3.73	0.9	0.6213	0.9987	0.997	2669.83	51.7709
	Merged Fascicle (P and RL)		21568.4	0.0215684	546.374	0.546374	-7000	1001	149.279	0.149279	189.976	0.189976	0.7858	0.8723	3.72	0.91	0.7609	0.9919	0.9905	2417.18	41.3788
	Merged Fascicle (P and RL)		20961.7	0.0209617	528.254	0.528254	-7000	1001	156.414	0.156414	180.737	0.180737	0.8654	0.9039	3.65	0.94	0.817	0.9969	0.9955	2337.01	29.5876
	Merged Fascicle (P and RL)		11351.8	0.0113518	404.263	0.404263	-7000	1001	93.2525	0.0932525	154.779	0.154779	0.6025	0.7767	3.79	0.87	0.6033	1	1	1788.47	22.9609
	Merged Fascicle (P and RL)		7711.4	0.0077114	331.408	0.331408	-7000	1001	86.2246	0.0862246	125.755	0.125755	0.6857	0.7879	3.77	0.88	0.6209	1	1.0002	1466.16	19.0836
	Merged Fascicle (P and RL)		16205.7	0.0162057	468.143	0.468143	-7000	1001	126.137	0.126137	162.67	0.16267	0.7754	0.883	3.68	0.93	0.7798	0.9995	0.9962	2071.08	25.168
	Mean Merged Fascicle	8	17662.6	0.0176626	494.353	0.494353	-7000	1001	125.067	0.125067	181.59	0.18159	0.685675	0.798388	3.845	0.85625	0.644925	0.9874	0.991762	2187.03	35.5979
	Standard Deviation		8833.96	0.00883396	138.166	0.138166	0	0	38.1712	0.0381712	45.2912	0.0452912	0.129393	0.0924042	0.230651	0.0933408	0.141473	0.0275081	0.00980014	611.253	14.986
	vagus nerve		3736870	3.73687	9156.46	9.15646	-7000	1001	1816.62	1.81662	3650.8	3.6508	0.4976	0.5975	4.74	0.56	0.357	0.9819	0.843	40508.5	297.917
	Superior cardiac
	Contour Name	Fascicle Count	Area (µm²)	Area (mm²)	Perimeter (µm)	Perimeter (mm)	Z position (µm)	Z plane	Feret Min (µm)	Feret Min (mm)	Feret Max (µm)	Feret Max (mm)	Aspect Ratio	Compactness	Shape Factor	Form Factor	Roundness	Convexity	Solidity	Area error coeff.	Perimeter error coef
	Cardiac Branch		130085	0.130085	1308.22	1.30822	-6937	992	366.677	0.366677	466.614	0.466614	0.7858	0.8722	3.63	0.96	0.7607	0.998	0.9978	5181.91	82.8027
	Cardiac Fascicle		26900.3	0.0269003	623.59	0.62359	-6937	992	158.442	0.158442	226.75	0.22675	0.6988	0.8162	3.8	0.87	0.6662	0.9869	0.9754	2470.07	43.8532
	Mean Cardiac Fascicle	1	26900.3	0.0269003	623.59	0.62359	-6937	992	158.442	0.158442	226.75	0.22675	0.6988	0.8162	3.8	0.87	0.6662	0.9869	0.9754	2470.07	43.8532
	Inferior cardiac
	Contour Name	Fascicle Count	Area (µm²)	Area (mm²)	Perimeter (µm)	Perimeter (mm)	Z position (µm)	Z plane	Feret Min (µm)	Feret Min (mm)	Feret Max (µm)	Feret Max (mm)	Aspect Ratio	Compactness	Shape Factor	Form Factor	Roundness	Convexity	Solidity	Area error coeff.	Perimeter error coef
	Cardiac Branch		134859	0.134859	1364.23	1.36423	-8869	1268	360.887	0.360887	504.505	0.504505	0.7153	0.8214	3.71	0.91	0.6746	0.9959	0.9895	5691.23	89.2791
	Cardiac Fascicle		32004.9	0.0320049	675.001	0.675001	-8869	1268	169.348	0.169348	258.008	0.258008	0.6564	0.7824	3.77	0.88	0.6122	0.9968	0.9922	2815.93	48.3468
	Mean Cardiac Fascicle	1	32004.9	0.0320049	675.001	0.675001	-8869	1268	169.348	0.169348	258.008	0.258008	0.6564	0.7824	3.77	0.88	0.6122	0.9968	0.9922	2815.93	48.3468
	Recurrent laryngeal
	Contour Name	Fascicle Count	Area (µm²)	Area (mm²)	Perimeter (µm)	Perimeter (mm)	Z position (µm)	Z plane	Feret Min (µm)	Feret Min (mm)	Feret Max (µm)	Feret Max (mm)	Aspect Ratio	Compactness	Shape Factor	Form Factor	Roundness	Convexity	Solidity	Area error coeff.	Perimeter error coef
	Recurrent Laryngeal Branch		721671	0.721671	3096.05	3.09605	-11200	1601	862.92	0.86292	1067.8	1.0678	0.8081	0.8977	3.64	0.95	0.8059	0.9977	0.9952	37313.5	192.86
	Recurrent Laryngeal Fascicle		11774	0.011774	447.621	0.447621	-11200	1601	84.7277	0.0847277	186.866	0.186866	0.4534	0.6552	4.13	0.74	0.4293	0.9971	0.9882	1873.65	28.2053
	Recurrent Laryngeal Fascicle		20552	0.020552	554.703	0.554703	-11200	1601	120.621	0.120621	220.897	0.220897	0.5461	0.7323	3.87	0.84	0.5363	0.9989	0.9974	2321.87	32.9411
	Recurrent Laryngeal Fascicle		8173.48	0.00817348	337.376	0.337376	-11200	1601	96.2732	0.0962732	115.47	0.11547	0.8337	0.8835	3.73	0.9	0.7805	0.997	0.9936	1412.19	26.5901
	Recurrent Laryngeal Fascicle		9399.93	0.00939993	386.448	0.386448	-11200	1601	86.1091	0.0861091	155.72	0.15572	0.553	0.7025	3.99	0.79	0.4936	0.9834	0.9818	1617.59	39.4284
	Recurrent Laryngeal Fascicle		8856.76	0.00885676	352.024	0.352024	-11200	1601	96.273	0.096273	123.605	0.123605	0.7789	0.8591	3.74	0.9	0.7381	0.9931	0.9854	1473.5	25.0894
	Recurrent Laryngeal Fascicle		11931.7	0.0119317	414.071	0.414071	-11200	1601	117.202	0.117202	143.053	0.143053	0.8193	0.8616	3.79	0.87	0.7424	0.9961	0.9906	1733.21	35.3007
	Recurrent Laryngeal Fascicle		15208.1	0.0152081	476.656	0.476656	-11200	1601	128.535	0.128535	180.572	0.180572	0.7118	0.7706	3.87	0.84	0.5939	0.9922	0.9921	1995.18	26.0356
	Recurrent Laryngeal Fascicle		2619.37	0.00261937	204.733	0.204733	-11200	1601	56.3284	0.0563284	73.2214	0.0732214	0.7693	0.7887	4	0.79	0.6221	0.9854	0.9581	856.968	19.8436
	Recurrent Laryngeal Fascicle		13780.1	0.0137801	445.089	0.445089	-11200	1601	113.656	0.113656	163.246	0.163246	0.6962	0.8114	3.79	0.87	0.6584	0.9971	0.9924	1863.05	32.5311
	Mean Recurrent Laryngeal Fascicle	9	11366.2	0.0113662	402.08	0.40208	-11200	1601	99.9696	0.0999696	151.406	0.151406	0.684633	0.784989	3.87889	0.837778	0.621622	0.993367	0.986622	1683.02	29.5517
	Standard Deviation		5028.87	0.00502887	99.2505	0.0992505	0	0	22.5917	0.0225917	43.7933	0.0437933	0.135679	0.0777899	0.13578	0.0547215	0.120507	0.00551589	0.0116448	415.442	6.00074
	Pulmonary
	Contour Name	Fascicle Count	Area (µm²)	Area (mm²)	Perimeter (µm)	Perimeter (mm)	Z position (µm)	Z plane	Feret Min (µm)	Feret Min (mm)	Feret Max (µm)	Feret Max (mm)	Aspect Ratio	Compactness	Shape Factor	Form Factor	Roundness	Convexity	Solidity	Area error coeff.	Perimeter error coef
	Pulmonary Branch		96612.9	0.0966129	1134.41	1.13441	-3325	476	297.176	0.297176	397.053	0.397053	0.7485	0.8833	3.65	0.94	0.7803	0.9991	0.9977	4267.32	57.7712
	Pulmonary Branch		435207	0.435207	2469.16	2.46916	-3325	476	632.422	0.632422	936.328	0.936328	0.6754	0.795	3.74	0.9	0.632	0.9984	0.9966	9288.29	114.09
	Pulmonary Fascicle		55597.4	0.0555974	943.448	0.943448	-3325	476	194.732	0.194732	394.263	0.394263	0.4939	0.6748	4	0.78	0.4554	0.9984	0.9909	3548.98	80.8511
	Pulmonary Fascicle		4032.91	0.00403291	244.683	0.244683	-3325	476	63.632	0.063632	90.2812	0.0902812	0.7048	0.7937	3.85	0.85	0.63	0.9982	0.9864	920.43	18.1747
	Pulmonary Fascicle		10124.7	0.0101247	392.012	0.392012	-3325	476	86.5195	0.0865195	151.406	0.151406	0.5714	0.7499	3.9	0.83	0.5623	1	0.9986	1474.64	21.8639
	Pulmonary Fascicle		4131.96	0.00413196	238.334	0.238334	-3325	476	67.7111	0.0677111	82.501	0.082501	0.8207	0.8792	3.71	0.91	0.7729	0.9998	0.9965	896.544	20.2387
	Pulmonary Fascicle		2639.1	0.0026391	201.748	0.201748	-3325	476	45.4221	0.0454221	77.1843	0.0771843	0.5885	0.751	3.93	0.81	0.564	0.9926	0.9868	758.919	20.262
	Mean Pulmonary Fascicle	5	15305.2	0.0153052	404.045	0.404045	-3325	476	91.6033	0.0916033	159.127	0.159127	0.63586	0.76972	3.878	0.836	0.59692	0.9978	0.99184	1519.9	32.2781
	Standard Deviation		22708.1	0.0227081	310.194	0.310194	0	0	59.4712	0.0594712	134.791	0.134791	0.127935	0.0746893	0.10849	0.0487852	0.116591	0.00301662	0.00555185	1166.86	27.1847
	NERVE 3
	SS cuff
	Contour Name	Fascicle Count	Area (µm²)	Area (mm²)	Perimeter (µm)	Perimeter (mm)	Z position (µm)	Z plane	Feret Min (µm)	Feret Min (mm)	Feret Max (µm)	Feret Max (mm)	Aspect Ratio	Compactness	Shape Factor	Form Factor	Roundness	Convexity	Solidity	Area error coeff.	Perimeter error coef
	Recurrent Laryngeal Fascicle		58672	0.058672	885.966	0.885966	-4956	709	231.696	0.231696	325.075	0.325075	0.7127	0.8408	3.66	0.94	0.7069	0.9998	0.9993	3195.2	45.2498
	Recurrent Laryngeal Fascicle		15185	0.015185	455.845	0.455845	-4956	709	118.028	0.118028	166.529	0.166529	0.7088	0.835	3.7	0.92	0.6972	0.9999	0.9991	1643.99	25.038
	Recurrent Laryngeal Fascicle		15744.6	0.0157446	464.288	0.464288	-4956	709	128.59	0.12859	171.034	0.171034	0.7518	0.8278	3.7	0.92	0.6853	1	1.0001	1674.44	26.5041
	Recurrent Laryngeal Fascicle		23880.2	0.0238802	583.544	0.583544	-4956	709	144.26	0.14426	224.941	0.224941	0.6413	0.7752	3.78	0.88	0.6009	0.9997	0.9984	2104.53	31.8709
	Recurrent Laryngeal Fascicle		39143.5	0.0391435	724.922	0.724922	-4956	709	192.237	0.192237	259.995	0.259995	0.7394	0.8587	3.66	0.94	0.7373	0.9989	0.9959	2614.4	44.5475
	Recurrent Laryngeal Fascicle		14314.2	0.0143142	450.766	0.450766	-4956	709	106.152	0.106152	171.452	0.171452	0.6191	0.7874	3.77	0.89	0.62	1	0.9999	1625.67	17.8665
	Recurrent Laryngeal Fascicle		11029.8	0.0110298	408.604	0.408604	-4956	709	89.5881	0.0895882	160.198	0.160198	0.5592	0.7397	3.89	0.83	0.5472	0.9984	0.9838	1473.61	26.8728
	Recurrent Laryngeal Fascicle		8539.2	0.0085392	376.148	0.376148	-4956	709	72.1302	0.0721302	155.366	0.155366	0.4643	0.6711	4.07	0.76	0.4504	1	1	1356.57	13.6469
	Recurrent Laryngeal Fascicle		9222.07	0.00922207	357.051	0.357051	-4956	709	93.7701	0.0937701	134.658	0.134658	0.6964	0.8047	3.72	0.91	0.6476	1	1	1287.69	21.4637
	Recurrent Laryngeal Fascicle		32640.1	0.0326401	670.037	0.670037	-4956	709	173.11	0.17311	246.504	0.246504	0.7023	0.827	3.71	0.91	0.6839	0.9961	0.9948	2416.46	33.2124
	Recurrent Laryngeal Fascicle		23061	0.023061	552.754	0.552754	-4956	709	153.624	0.153624	194.656	0.194656	0.7892	0.8803	3.64	0.95	0.7749	1	1	1836.11	30.373
	Mean Recurrent Laryngeal Fascicle	11	22857.4	0.0228574	539.084	0.539084	-4956	709	136.653	0.136653	200.946	0.200946	0.671318	0.804336	3.75455	0.895455	0.650145	0.999345	0.997391	1929.88	28.786
	Standard Deviation		15355.7	0.0153557	164.684	0.164684	0	0	48.3292	0.0483292	57.155	0.057155	0.0942177	0.0592669	0.126045	0.0561006	0.0920904	0.0012003	0.00485066	594.514	9.87962
	Pulmonary Fascicle		11403.3	0.0114033	397.282	0.397282	-4956	709	99.6498	0.0996498	138.72	0.13872	0.7184	0.8686	3.72	0.91	0.7545	1	1	1319.67	14.326
	Pulmonary Fascicle		25588	0.025588	586.698	0.586698	-4956	709	159.191	0.159191	216.755	0.216755	0.7344	0.8327	3.67	0.93	0.6934	1	0.9996	1948.86	29.6543
	Pulmonary Fascicle		21791.9	0.0217919	549.331	0.549331	-4956	709	161.527	0.161527	182.419	0.182419	0.8855	0.9131	3.72	0.91	0.8338	0.9922	0.9733	1824.74	29.5454
	Pulmonary Fascicle		18388.5	0.0183885	502.937	0.502937	-4956	709	130.323	0.130323	187.23	0.18723	0.6961	0.8172	3.71	0.91	0.6679	0.9996	0.9946	1670.63	25.6474
	Pulmonary Fascicle		14272.1	0.0142721	438.998	0.438998	-4956	709	116.712	0.116712	156.795	0.156795	0.7444	0.8597	3.67	0.93	0.7391	1	0.9992	1458.24	20.3103
	Pulmonary Fascicle		32047.8	0.0320478	649.99	0.64999	-4956	709	182.005	0.182005	226.702	0.226702	0.8028	0.891	3.63	0.95	0.794	0.9999	0.9992	2159.1	32.1662
	Pulmonary Fascicle		14360.6	0.0143606	439	0.439	-4956	709	119.58	0.11958	150.111	0.150111	0.7966	0.9008	3.66	0.94	0.8114	1	1	1458.25	15.427
	Pulmonary Fascicle		20153.5	0.0201535	520.664	0.520664	-4956	709	147.963	0.147963	180.881	0.180881	0.818	0.8856	3.67	0.93	0.7843	0.9999	0.9992	1729.51	24.3508
	Pulmonary Fascicle		7977.79	0.00797779	331.142	0.331142	-4956	709	95.1898	0.0951898	117.443	0.117443	0.8105	0.8582	3.71	0.91	0.7364	1	0.9999	1099.97	13.5736
	Pulmonary Fascicle		24771.7	0.0247717	576.463	0.576463	-4956	709	163.885	0.163885	201.073	0.201073	0.8151	0.8832	3.66	0.94	0.7801	0.9997	0.9956	1914.86	34.9097
	Pulmonary Fascicle		17516.5	0.0175165	481.678	0.481678	-4956	709	138.202	0.138202	167.971	0.167971	0.8228	0.8891	3.64	0.95	0.7905	1	0.9999	1600.01	26.7305
	Pulmonary Fascicle		8612.22	0.00861222	341.999	0.341999	-4956	709	99.4409	0.0994409	118.847	0.118847	0.8367	0.8811	3.69	0.93	0.7763	1	1	1136.03	15.0778
	Pulmonary Fascicle		19110.7	0.0191107	502.303	0.502303	-4956	709	138.225	0.138225	179.655	0.179655	0.7694	0.8683	3.63	0.95	0.7539	1	1	1668.52	24.1832
	Pulmonary Fascicle		15315.2	0.0153152	451.992	0.451992	-4956	709	127.755	0.127755	157.108	0.157108	0.8132	0.8888	3.65	0.94	0.79	0.9978	0.9957	1501.4	23.7008
	Pulmonary Fascicle		7293.19	0.00729319	315.089	0.315089	-4956	709	86.9391	0.0869391	117.53	0.11753	0.7397	0.8199	3.69	0.92	0.6722	1	1	1046.64	21.0813
	Pulmonary Fascicle		7741.04	0.00774104	331.163	0.331163	-4956	709	93.0101	0.0930101	114.403	0.114403	0.813	0.8678	3.76	0.89	0.7531	1	0.9999	1100.04	18.5468
	Mean Pulmonary Fascicle	16	16646.5	0.0166465	463.546	0.463546	-4956	709	128.725	0.128725	163.353	0.163353	0.788538	0.870319	3.68	0.9275	0.758181	0.999319	0.997256	1539.78	23.0769
	Standard Deviation		7203.8	0.0072038	101.417	0.101417	0	0	29.1088	0.0291088	35.8367	0.0358367	0.0500137	0.0276271	0.036697	0.0177012	0.0476218	0.00197525	0.00664108	336.881	6.59536
	Merged Fascicle (P and RL)		13306.5	0.0133065	425.454	0.425454	-4956	709	123.629	0.123629	149.067	0.149067	0.8293	0.8732	3.69	0.92	0.7624	0.9975	0.9972	1502.81	30.6622
	Merged Fascicle (P and RL)		16756.3	0.0167563	507.031	0.507031	-4956	709	131.567	0.131567	179.068	0.179068	0.7347	0.8157	3.92	0.82	0.6654	0.9868	0.9451	1790.96	35.2032
	Mean Merged Fascicle	3	12422.2	0.0124222	344.634	0.344634	-3304	472.667	94.7683	0.0947683	121.324	0.121324	0.538005	0.572176	2.5489	0.5859	0.491807	0.662092	0.649647	1210.22	24.1536
	Standard Deviation		2439.38	0.00243938	57.6835	0.0576835	0	0	5.61351	0.00561351	21.2139	0.0212139	0.0668923	0.0406586	0.162635	0.0707107	0.0685894	0.00756604	0.0368403	203.752	3.21097
	Cardiac Fascicle		61587.4	0.0615874	944.689	0.000944689	-4956	709	249.983	0.249983	353.509	0.353509	0.7071	0.7921	3.81	0.87	0.6275	0.9982	0.9898	9705.43	83.7767
	Mean Cardiac Fascicle	1	61587.4	0.0615874	944.689	0.000944689	-4956	709	249.983	0.249983	353.509	0.353509	0.7071	0.7921	3.81	0.87	0.6275	0.9982	0.9898	9705.43	83.7767
	vagus nerve		2815030	2.81503	6489.26	6.48926	-4956	709	1830.53	1.83053	2203.15	2.20315	0.8309	0.8593	3.87	0.84	0.7384	0.9835	0.9585	22921.7	271.985
	EIT cuff
	Contour Name	Fascicle Count	Area (µm²)	Area (mm²)	Perimeter (µm)	Perimeter (mm)	Z position (µm)	Z plane	Feret Min (µm)	Feret Min (mm)	Feret Max (µm)	Feret Max (mm)	Aspect Ratio	Compactness	Shape Factor	Form Factor	Roundness	Convexity	Solidity	Area error coeff.	Perimeter error coef
	Recurrent Laryngeal Fascicle		20365.7	0.0203657	524.312	0.524312	-4956	709	144.13	0.14413	192.682	0.192682	0.748	0.8357	3.67	0.93	0.6984	1	1	1717.45	23.9007
	Recurrent Laryngeal Fascicle		10306.6	0.0103066	374.634	0.374634	-4956	709	99.2394	0.0992394	133.704	0.133704	0.7422	0.8568	3.69	0.92	0.7341	0.9997	0.9969	1227.16	16.391
	Recurrent Laryngeal Fascicle		30333.1	0.0303331	648.693	0.648693	-4956	709	166.993	0.166993	247.931	0.247931	0.6735	0.7927	3.72	0.91	0.6283	1	0.9988	2124.87	38.5123
	Recurrent Laryngeal Fascicle		23005.7	0.0230057	572.804	0.572804	-4956	709	135.767	0.135767	216.987	0.216987	0.6257	0.7887	3.78	0.88	0.6221	1	1	1876.29	26.9851
	Recurrent Laryngeal Fascicle		26861.9	0.0268619	606.196	0.606196	-4956	709	154.609	0.154609	229.413	0.229413	0.6739	0.8061	3.7	0.92	0.6498	1	1	1985.67	30.7966
	Recurrent Laryngeal Fascicle		10933.5	0.0109335	384.501	0.384501	-4956	709	101.804	0.101804	142.708	0.142708	0.7134	0.8268	3.68	0.93	0.6836	1	1	1259.48	21.4036
	Recurrent Laryngeal Fascicle		13336.6	0.0133366	440.422	0.440422	-4956	709	105.969	0.105969	173.635	0.173635	0.6103	0.7505	3.81	0.86	0.5632	1	0.9984	1442.66	20.6418
	Recurrent Laryngeal Fascicle		27226.4	0.0272264	615.931	0.615931	-4956	709	152.535	0.152535	232.017	0.232017	0.6574	0.8025	3.73	0.9	0.644	0.9986	0.9937	2017.56	35.7551
	Recurrent Laryngeal Fascicle		10391.3	0.0103913	372.072	0.372072	-4956	709	104.446	0.104446	125.85	0.12585	0.8299	0.914	3.65	0.94	0.8354	1	1	1218.77	17.2847
	Recurrent Laryngeal Fascicle		8653.72	0.00865372	346.832	0.346832	-4956	709	96.447	0.096447	118.11	0.11811	0.8166	0.8887	3.73	0.9	0.7898	1	1	1136.09	16.6099
	Mean Recurrent Laryngeal Fascicle	10	18141.5	0.0181415	488.64	0.48864	-4956	709	126.194	0.126194	181.304	0.181304	0.70909	0.82625	3.716	0.909	0.68487	0.99983	0.99878	1600.6	24.8281
	Standard Deviation		8315.55	0.00831555	117.313	0.117313	0	0	27.2182	0.0272182	49.0025	0.0490025	0.0750352	0.0492913	0.0494862	0.0246982	0.0824095	0.000442342	0.00206602	384.272	7.97685
	Pulmonary Fascicle		60369.1	0.0603691	901.648	0.901648	-4956	709	237.77	0.23777	318.869	0.318869	0.7457	0.8695	3.67	0.93	0.756	0.9946	0.9965	2820.93	44.2056
	Pulmonary Fascicle		15573.3	0.0155733	467.718	0.467718	-4956	709	124.486	0.124486	170.708	0.170708	0.7292	0.8249	3.75	0.89	0.6804	0.9988	0.99	1463.32	27.6895
	Pulmonary Fascicle		19238.8	0.0192388	506.361	0.506361	-4956	709	145.756	0.145756	179.097	0.179097	0.8138	0.8739	3.65	0.94	0.7637	0.9999	0.9997	1584.22	24.7119
	Pulmonary Fascicle		25171	0.025171	577.375	0.577375	-4956	709	167.721	0.167721	197.005	0.197005	0.8514	0.9087	3.64	0.95	0.8258	0.9993	0.9957	1806.4	28.7837
	Pulmonary Fascicle		27128.3	0.0271283	599.795	0.599795	-4956	709	179.615	0.179615	201.04	0.20104	0.8934	0.9245	3.64	0.95	0.8546	0.999	0.9946	1876.54	37.5377
	Pulmonary Fascicle		19263.2	0.0192632	507.805	0.507805	-4956	709	138.763	0.138763	183.552	0.183552	0.756	0.8532	3.66	0.94	0.728	1	1	1588.74	22.2003
	Pulmonary Fascicle		18279.3	0.0182793	521.866	0.521866	-4956	709	114.488	0.114488	206.581	0.206581	0.5542	0.7385	3.86	0.84	0.5454	0.9986	0.9957	1632.73	29.5396
	Pulmonary Fascicle		43001.1	0.0430011	772.467	0.772467	-4956	709	198.218	0.198218	288.187	0.288187	0.6878	0.8119	3.73	0.91	0.6592	0.9942	0.9893	2416.77	56.0546
	Pulmonary Fascicle		36231.3	0.0362313	700.893	0.700893	-4956	709	194.676	0.194676	258	0.258	0.7546	0.8325	3.68	0.93	0.693	0.9944	0.9933	2192.84	41.6251
	Pulmonary Fascicle		24798	0.024798	576.987	0.576987	-4956	709	157.37	0.15737	202.876	0.202876	0.7757	0.8759	3.66	0.94	0.7671	0.9986	0.9961	1805.19	28.9071
	Pulmonary Fascicle		8888.19	0.00888819	359.565	0.359565	-4956	709	97.6351	0.0976351	126.125	0.126125	0.7741	0.8435	3.81	0.86	0.7114	0.997	0.9924	1124.95	28.0609
	Mean Pulmonary Fascicle	11	27085.6	0.0270856	590.225	0.590225	-4956	709	159.682	0.159682	212.004	0.212004	0.757809	0.850636	3.70455	0.916364	0.725873	0.997673	0.994845	1846.6	33.5742
	Standard Deviation		14552.1	0.0145521	151.521	0.151521	0	0	41.2763	0.0412763	55.4712	0.0554712	0.0884315	0.050484	0.074211	0.0374894	0.0842451	0.00224593	0.00344336	474.055	10.163
	Cardiac Fascicle		16233.7	0.0162337	482.924	0.482924	-4956	709	117.534	0.117534	184.348	0.184348	0.6376	0.7799	3.79	0.87	0.6082	0.999	0.9963	1464.17	28.316
	Cardiac Fascicle		34563.2	0.0345632	718.584	0.718584	-4956	709	162.738	0.162738	282.405	0.282405	0.5763	0.7428	3.87	0.84	0.5518	0.9992	0.9991	2178.66	32.3509
	Mean Cardiac Fascicle	2	25398.4	0.0253984	600.754	0.600754	-4956	709	140.136	0.140136	233.377	0.233377	0.60695	0.76135	3.83	0.855	0.58	0.9991	0.9977	1821.42	30.3334
	Standard Deviation		12960.9	0.0129609	166.637	0.166637	0	0	31.9642	0.0319642	69.3372	0.0693372	0.0433456	0.0262337	0.0565685	0.0212132	0.0398808	0.000141421	0.0019799	505.224	2.85311
	vagus nerve		2159000	2.159	6281.01	6.28101	-4956	709	1470.08	1.47008	2354.13	2.35413	0.6245	0.7043	4.27	0.69	0.496	0.9862	0.9105	19043.3	214.732
	Superior cardiac branch
	Contour Name	Fascicle Count	Area (µm²)	Area (mm²)	Perimeter (µm)	Perimeter (mm)	Z position (µm)	Z plane	Feret Min (µm)	Feret Min (mm)	Feret Max (µm)	Feret Max (mm)	Aspect Ratio	Compactness	Shape Factor	Form Factor	Roundness	Convexity	Solidity	Area error coeff.	Perimeter error coef
	Cardiac Branch		145327	0.145327	1434.24	1.43424	-3304	473	375.652	0.375652	505.643	0.505643	0.7429	0.8507	3.76	0.89	0.7237	0.9935	0.9897	6165.15	93.4463
	Cardiac Fascicle		19290.7	0.0192907	526.076	0.526076	-3304	473	122.835	0.122835	189.917	0.189917	0.6468	0.8252	3.79	0.88	0.681	0.9975	0.9934	2261.37	39.7672
	Mean Cardiac Fascicle	1	19290.7	0.0192907	526.076	0.526076	-3304	473	122.835	0.122835	189.917	0.189917	0.6468	0.8252	3.79	0.88	0.681	0.9975	0.9934	2261.37	39.7672
	Inferior cardiac branch
	Contour Name	Fascicle Count	Area (µm²)	Area (mm²)	Perimeter (µm)	Perimeter (mm)	Z position (µm)	Z plane	Feret Min (µm)	Feret Min (mm)	Feret Max (µm)	Feret Max (mm)	Aspect Ratio	Compactness	Shape Factor	Form Factor	Roundness	Convexity	Solidity	Area error coeff.	Perimeter error coef
	Cardiac Branch		56034	0.056034	888.757	0.888757	-4585	656	211.977	0.211977	333.361	0.333361	0.6359	0.8012	3.75	0.89	0.642	0.997	0.991	2360.49	64.2546
	Cardiac Fascicle		11388.8	0.0113888	400.796	0.400796	-4585	656	97.2825	0.0972825	149.679	0.149679	0.6499	0.8045	3.76	0.89	0.6472	0.9962	0.9842	1064.49	24.9668
	Mean Cardiac Fascicle	1	11388.8	0.0113888	400.796	0.400796	-4585	656	97.2825	0.0972825	149.679	0.149679	0.6499	0.8045	3.76	0.89	0.6472	0.9962	0.9842	1064.49	24.9668
	Recurrent laryngeal branch
	Contour Name	Fascicle Count	Area (µm²)	Area (mm²)	Perimeter (µm)	Perimeter (mm)	Z position (µm)	Z plane	Feret Min (µm)	Feret Min (mm)	Feret Max (µm)	Feret Max (mm)	Aspect Ratio	Compactness	Shape Factor	Form Factor	Roundness	Convexity	Solidity	Area error coeff.	Perimeter error coef
	Recurrent Laryngeal Branch		347462	0.347462	2230.51	2.23051	-2107	302	520.367	0.520367	868.972	0.868972	0.5988	0.7654	3.78	0.88	0.5859	0.9987	0.9925	9236.47	103.406
	Recurrent Laryngeal Fascicle		16426	0.016426	498.91	0.49891	-2107	302	108.717	0.108717	200.286	0.200286	0.5428	0.7221	3.89	0.83	0.5214	1	1.0001	2509.92	27.1753
	Recurrent Laryngeal Fascicle		9541.56	0.00954156	389.14	0.38914	-2107	302	79.4646	0.0794646	147.965	0.147965	0.537	0.7449	3.98	0.79	0.5549	1	0.9998	1957.69	26.1623
	Recurrent Laryngeal Fascicle		2366.19	0.00236619	185.131	0.185131	-2107	302	49.6482	0.0496482	65.3999	0.0653999	0.7591	0.8393	3.81	0.87	0.7044	1	0.9997	931.357	17.2108
	Recurrent Laryngeal Fascicle		9655.07	0.00965507	370.293	0.370293	-2107	302	90.3515	0.0903515	139.508	0.139508	0.6476	0.7948	3.77	0.88	0.6316	1	1	1862.87	25.5138
	Recurrent Laryngeal Fascicle		8275.93	0.00827593	357.85	0.35785	-2107	302	79.8674	0.0798674	135.459	0.135459	0.5896	0.7578	3.93	0.81	0.5743	0.9898	0.9821	1800.28	22.8092
	Recurrent Laryngeal Fascicle		11375.8	0.0113758	445.778	0.445778	-2107	302	78.7884	0.0787884	182.355	0.182355	0.4321	0.66	4.18	0.72	0.4356	1	1	2242.62	30.0052
	Recurrent Laryngeal Fascicle		5314.79	0.00531479	283.748	0.283748	-2107	302	71.1384	0.0711384	101.858	0.101858	0.6984	0.8076	3.89	0.83	0.6522	1	1	1427.48	29.0988
	Mean Recurrent Laryngeal Fascicle	7	8993.62	0.00899362	361.55	0.36155	-2107	302	79.7108	0.0797108	138.976	0.138976	0.600943	0.760929	3.92143	0.818571	0.582057	0.998543	0.997386	1818.89	25.4251
	Standard Deviation		4465.13	0.00446513	103.272	0.103272	0	0	17.948	0.017948	45.6897	0.0456897	0.110147	0.0597614	0.133969	0.0536745	0.089693	0.00385524	0.00674177	519.54	4.32831
	Pulmonary branch
	Contour Name	Fascicle Count	Area (µm²)	Area (mm²)	Perimeter (µm)	Perimeter (mm)	Z position (µm)	Z plane	Feret Min (µm)	Feret Min (mm)	Feret Max (µm)	Feret Max (mm)	Aspect Ratio	Compactness	Shape Factor	Form Factor	Roundness	Convexity	Solidity	Area error coeff.	Perimeter error coef
	Pulmonary Branch		199696	0.199696	1772.62	1.77262	-4963	710	468.832	0.468832	611.694	0.611694	0.7664	0.8243	3.97	0.8	0.6795	0.9813	0.9397	18211.3	129.956
	Pulmonary Fascicle		4821.1	0.0048211	362.029	0.362029	-4963	710	39.6106	0.0396106	159.76	0.15976	0.2479	0.4904	5.21	0.46	0.2405	0.9838	0.8961	957.998	36.5945
	Pulmonary Fascicle		2433.31	0.00243331	202.802	0.202802	-4963	710	39.2941	0.0392941	86.0725	0.0860725	0.4565	0.6467	4.11	0.74	0.4182	0.9932	0.9706	536.653	16.5726
	Pulmonary Fascicle		3161.54	0.00316154	213.749	0.213749	-4963	710	60.1553	0.0601553	72.2267	0.0722267	0.8329	0.8784	3.8	0.87	0.7716	0.9885	0.9659	565.622	13.3917
	Pulmonary Fascicle		1078.37	0.00107837	129.182	0.129182	-4963	710	30.37	0.03037	50.8317	0.0508317	0.5975	0.729	3.93	0.81	0.5314	0.9981	0.9803	341.841	14.4695
	Pulmonary Fascicle		3277.09	0.00327709	245.437	0.245437	-4963	710	46.6922	0.0466922	108.623	0.108623	0.4299	0.5947	4.29	0.68	0.3536	0.9981	0.988	649.474	21.82
	Mean Pulmonary Fascicle	6	35744.6	0.0357446	487.637	0.487637	-4963	710	114.159	0.114159	181.535	0.181535	0.555183	0.693917	4.21833	0.726667	0.499133	0.9905	0.956767	3543.82	38.8007
	Standard Deviation		1362.23	0.00136223	84.9057	0.0849057	0	0	11.0953	0.0110953	41.6155	0.0416155	0.21786	0.14608	0.55814	0.158019	0.20211	0.00622037	0.0368317	224.677	9.5272
	NERVE 4
	SS cuff
	Contour Name	Fascicle Count	Area (µm²)	Area (mm²)	Perimeter (µm)	Perimeter (mm)	Z position (µm)	Z plane	Feret Min (µm)	Feret Min (mm)	Feret Max (µm)	Feret Max (mm)	Aspect Ratio	Compactness	Shape Factor	Form Factor	Roundness	Convexity	Solidity	Area error coeff.	Perimeter error coef
	Cardiac Fascicle		34647	0.034647	683.748	0.683748	-11900	1701	193.902	0.193902	238.168	0.238168	0.8141	0.8819	3.67	0.93	0.7777	0.9985	0.9949	1857.25	36.0659
	Mean Cardiac Fascicle	1	34647	0.034647	683.748	0.683748	-11900	1701	193.902	0.193902	238.168	0.238168	0.8141	0.8819	3.67	0.93	0.7777	0.9985	0.9949	1857.25	36.0659
	Pulmonary Fascicle		27604.7	0.0276047	604.65	0.60465	-11900	1701	175.314	0.175314	208.211	0.208211	0.842	0.9004	3.64	0.95	0.8108	1	1	1642.39	31.9634
	Pulmonary Fascicle		5968.61	0.00596861	303.369	0.303369	-11900	1701	85.2271	0.0852271	104.848	0.104848	0.8129	0.8314	3.93	0.81	0.6913	1	0.9999	824.034	10.6692
	Pulmonary Fascicle		18500.7	0.0185007	496.903	0.496903	-11900	1701	143.072	0.143072	169.717	0.169717	0.843	0.9043	3.65	0.94	0.8178	0.9989	0.996	1349.72	21.876
	Pulmonary Fascicle		21121	0.021121	538.92	0.53892	-11900	1701	142.135	0.142135	199.258	0.199258	0.7133	0.823	3.71	0.91	0.6773	0.9981	0.9986	1463.85	26.0294
	Pulmonary Fascicle		19050.5	0.0190505	499.722	0.499722	-11900	1701	141.014	0.141014	168.666	0.168666	0.8361	0.9234	3.62	0.96	0.8526	1	1.0002	1357.38	19.8006
	Pulmonary Fascicle		12962.7	0.0129627	416.275	0.416275	-11900	1701	117.83	0.11783	150.25	0.15025	0.7842	0.855	3.66	0.94	0.7311	1	1.0001	1130.72	24.2457
	Pulmonary Fascicle		17954.7	0.0179547	488.684	0.488684	-11900	1701	142.138	0.142138	164.097	0.164097	0.8662	0.9214	3.65	0.94	0.849	1	1	1327.4	17.7472
	Pulmonary Fascicle		17740.2	0.0177402	519.855	0.519855	-11900	1701	116.77	0.11677	197.56	0.19756	0.5911	0.7607	3.9	0.82	0.5787	0.9815	0.9813	1412.07	30.7509
	Pulmonary Fascicle		27862.8	0.0278628	618.004	0.618004	-11900	1701	154.994	0.154994	224.261	0.224261	0.6911	0.8399	3.7	0.92	0.7054	0.9985	0.9975	1678.67	28.7625
	Mean Pulmonary Fascicle	9	18751.8	0.0187518	498.487	0.498487	-11900	1701	135.388	0.135388	176.319	0.176319	0.775544	0.862167	3.71778	0.91	0.746	0.997444	0.997067	1354.03	23.5383
	Standard Deviation		6761.4	0.0067614	95.2472	0.0952472	0	0	25.815	0.025815	35.9377	0.0359377	0.0917519	0.0545646	0.115518	0.0559017	0.0928024	0.00602642	0.0060881	258.717	6.82721
	Recurrent Laryngeal Fascicle		28713.3	0.0287133	614.661	0.614661	-11900	1701	184.584	0.184584	208.233	0.208233	0.8864	0.9182	3.63	0.96	0.8431	0.9988	0.9984	1669.59	26.5852
	Recurrent Laryngeal Fascicle		44250.3	0.0442503	813.07	0.81307	-11900	1701	180.464	0.180464	324.383	0.324383	0.5563	0.7317	3.87	0.84	0.5354	0.999	0.9951	2208.52	30.2167
	Recurrent Laryngeal Fascicle		21503.7	0.0215037	536.943	0.536943	-11900	1701	143.595	0.143595	193.313	0.193313	0.7428	0.856	3.66	0.94	0.7327	0.9999	0.9995	1458.48	29.862
	Recurrent Laryngeal Fascicle		22186.2	0.0221862	540.75	0.54075	-11900	1701	152.11	0.15211	187.322	0.187322	0.812	0.8972	3.63	0.95	0.805	1	1	1468.82	24.1579
	Recurrent Laryngeal Fascicle		25354.8	0.0253548	584.261	0.584261	-11900	1701	157.415	0.157415	214.74	0.21474	0.733	0.8367	3.67	0.93	0.7001	1	1	1587.01	26.3471
	Recurrent Laryngeal Fascicle		13616.7	0.0136167	432.203	0.432203	-11900	1701	113.676	0.113676	156.943	0.156943	0.7243	0.839	3.7	0.92	0.7039	1	1.0001	1173.98	21.4108
	Recurrent Laryngeal Fascicle		20869	0.020869	527.268	0.527268	-11900	1701	141.342	0.141342	185.129	0.185129	0.7635	0.8805	3.65	0.94	0.7753	1	1.0001	1432.2	17.2596
	Recurrent Laryngeal Fascicle		26052.5	0.0260525	588.004	0.588004	-11900	1701	174.145	0.174145	203.634	0.203634	0.8552	0.8944	3.64	0.95	0.7999	0.9998	0.999	1597.18	40.9946
	Recurrent Laryngeal Fascicle		10908.5	0.0109085	389.263	0.389263	-11900	1701	103.22	0.10322	142.959	0.142959	0.722	0.8244	3.73	0.9	0.6796	1	0.9993	1057.34	17.6918
	Recurrent Laryngeal Fascicle		17482.9	0.0174829	493.197	0.493197	-11900	1701	130.727	0.130727	185.821	0.185821	0.7035	0.8029	3.73	0.9	0.6447	0.9998	0.9993	1339.66	25.7162
	Recurrent Laryngeal Fascicle		18128.4	0.0181284	505.994	0.505994	-11900	1701	122.972	0.122972	190.062	0.190062	0.647	0.7994	3.76	0.89	0.639	0.9997	0.9968	1374.42	21.5593
	Recurrent Laryngeal Fascicle		21366.5	0.0213665	556.808	0.556808	-11900	1701	131.108	0.131108	222.835	0.222835	0.5884	0.7402	3.81	0.87	0.5479	1	0.9999	1512.44	24.6569
	Recurrent Laryngeal Fascicle		29497.2	0.0294972	630.279	0.630279	-11900	1701	171.12	0.17112	220.435	0.220435	0.7763	0.8792	3.67	0.93	0.7729	0.9994	0.997	1712.01	31.1903
	Recurrent Laryngeal Fascicle		16655.6	0.0166556	484.174	0.484174	-11900	1701	128.759	0.128759	171.146	0.171146	0.7523	0.8509	3.75	0.89	0.724	1	1	1315.15	7.9843
	Recurrent Laryngeal Fascicle		13272.9	0.0132729	425.52	0.42552	-11900	1701	118.493	0.118493	150.258	0.150258	0.7886	0.8652	3.69	0.92	0.7485	1	0.999	1155.83	17.0658
	Mean Recurrent Laryngeal Fascicle	15	21990.6	0.0219906	541.493	0.541493	-11900	1701	143.582	0.143582	197.147	0.197147	0.736773	0.84106	3.706	0.915333	0.710133	0.99976	0.9989	1470.84	24.1799
	Standard Deviation		8278.24	0.00827824	102.43	0.10243	0	0	25.5249	0.0255249	42.8678	0.0428678	0.0892236	0.0544356	0.0695701	0.0333524	0.0895873	0.000388771	0.00148613	278.229	7.70486
	Merged Fascicle (P and RL)		84427.8	0.0844278	1083.58	1.08358	-11900	1701	268.346	0.268346	418.121	0.418121	0.6418	0.7841	3.73	0.9	0.6149	0.9983	0.9981	4762.83	69.613
	Merged Fascicle (P and RL)		64132.3	0.0641323	934.383	0.934383	-11900	1701	235.884	0.235884	342.111	0.342111	0.6895	0.8353	3.69	0.92	0.6977	1	1.0001	4107.02	47.6326
	Mean Merged Fascicle	2	74280.1	0.0742801	1008.98	1.00898	-11900	1701	252.115	0.252115	380.116	0.380116	0.66565	0.8097	3.71	0.91	0.6563	0.99915	0.9991	4434.93	58.6228
	Standard Deviation		14351.1	0.0143511	105.502	0.105502	0	0	22.9543	0.0229543	53.7477	0.0537477	0.033729	0.0362039	0.0282843	0.0141421	0.0585484	0.00120208	0.00141421	463.726	15.5425
	vagus nerve		3447040	3.44704	7003.87	7.00387	-11900	1701	1913.67	1.91367	2538.97	2.53897	0.7537	0.8251	3.77	0.88	0.6808	0.993	0.9837	30785.1	260.156
	EIT cuff
	Contour Name	Fascicle Count	Area (µm²)	Area (mm²)	Perimeter (µm)	Perimeter (mm)	Z position (µm)	Z plane	Feret Min (µm)	Feret Min (mm)	Feret Max (µm)	Feret Max (mm)	Aspect Ratio	Compactness	Shape Factor	Form Factor	Roundness	Convexity	Solidity	Area error coeff.	Perimeter error coef
	Cardiac Fascicle		20289.3	0.0202893	524.193	0.524193	-12600	1801	151.958	0.151958	185.122	0.185122	0.8209	0.8682	3.68	0.93	0.7538	0.9927	0.989	1582.39	48.4394
	Mean Cardiac Fascicle	1	20289.3	0.0202893	524.193	0.524193	-12600	1801	151.958	0.151958	185.122	0.185122	0.8209	0.8682	3.68	0.93	0.7538	0.9927	0.989	1582.39	48.4394
	Recurrent Laryngeal Fascicle		24644.9	0.0246449	568.451	0.568451	-12600	1801	166.056	0.166056	194.889	0.194889	0.8521	0.9089	3.62	0.96	0.8262	0.9992	0.9978	1715.99	37.3475
	Recurrent Laryngeal Fascicle		13409.4	0.0134094	429.721	0.429721	-12600	1801	124.2	0.1242	150.725	0.150725	0.824	0.8669	3.71	0.91	0.7515	0.998	0.994	1297.2	27.563
	Recurrent Laryngeal Fascicle		25177.3	0.0251773	584.823	0.584823	-12600	1801	153.448	0.153448	209.356	0.209356	0.733	0.8552	3.69	0.93	0.7314	0.9977	0.999	1765.41	18.0983
	Recurrent Laryngeal Fascicle		8920.88	0.00892088	370.041	0.370041	-12600	1801	84.157	0.084157	152.738	0.152738	0.551	0.6978	3.92	0.82	0.4869	1	0.9999	1117.05	16.7708
	Recurrent Laryngeal Fascicle		13641.5	0.0136415	428.365	0.428365	-12600	1801	122.182	0.122182	145.406	0.145406	0.8403	0.9064	3.67	0.93	0.8215	0.9989	0.9968	1293.11	17.4963
	Recurrent Laryngeal Fascicle		16425.3	0.0164253	471.155	0.471155	-12600	1801	132.06	0.13206	167.745	0.167745	0.7873	0.8621	3.68	0.93	0.7432	1	1	1422.28	22.1533
	Recurrent Laryngeal Fascicle		11632.6	0.0116326	403.1	0.4031	-12600	1801	105.13	0.10513	151.69	0.15169	0.6931	0.8023	3.74	0.9	0.6437	0.9965	0.9872	1216.84	20.958
	Recurrent Laryngeal Fascicle		14944.1	0.0149441	449.296	0.449296	-12600	1801	123.135	0.123135	157.491	0.157491	0.7819	0.8759	3.68	0.93	0.7671	0.9975	0.9955	1356.29	22.783
	Recurrent Laryngeal Fascicle		6196.49	0.00619649	300.968	0.300968	-12600	1801	76.495	0.076495	115.542	0.115542	0.6621	0.7688	3.82	0.86	0.591	0.9999	0.9977	908.535	16.3685
	Recurrent Laryngeal Fascicle		31433.7	0.0314337	646.903	0.646903	-12600	1801	171.056	0.171056	236.768	0.236768	0.7225	0.8449	3.65	0.94	0.7139	0.9995	0.9988	1952.81	31.939
	Recurrent Laryngeal Fascicle		16935.8	0.0169358	475.35	0.47535	-12600	1801	137.192	0.137192	162.449	0.162449	0.8445	0.9039	3.65	0.94	0.8171	0.9973	0.9938	1434.94	18.0766
	Recurrent Laryngeal Fascicle		6634.06	0.00663406	298.848	0.298848	-12600	1801	86.975	0.086975	101.258	0.101258	0.8589	0.9076	3.67	0.93	0.8238	1	0.9999	902.137	17.2394
	Mean Recurrent Laryngeal Fascicle	12	15833	0.015833	452.252	0.452252	-12600	1801	123.507	0.123507	162.171	0.162171	0.762558	0.850058	3.70833	0.915	0.726442	0.998708	0.9967	1365.22	22.2328
	Standard Deviation		7771.07	0.00777107	107.254	0.107254	0	0	31.1323	0.0311323	37.429	0.037429	0.0938909	0.0647109	0.0840815	0.0389639	0.105313	0.00124933	0.00370111	323.77	6.73505
	Pulmonary Fascicle		21100.1	0.0211001	542.7	0.5427	-12600	1801	133.438	0.133438	197.145	0.197145	0.6769	0.8314	3.74	0.9	0.6912	0.999	0.9975	1638.25	28.9008
	Pulmonary Fascicle		9162.64	0.00916264	355.218	0.355218	-12600	1801	89.4849	0.0894849	130.325	0.130325	0.6866	0.8288	3.71	0.91	0.6869	0.9992	0.9931	1072.3	24.9304
	Pulmonary Fascicle		5340.1	0.0053401	275.184	0.275184	-12600	1801	72.3375	0.0723375	102.635	0.102635	0.7048	0.8034	3.77	0.89	0.6455	1	1	830.699	12.0461
	Pulmonary Fascicle		16284.6	0.0162846	475.969	0.475969	-12600	1801	121.956	0.121956	177.566	0.177566	0.6868	0.8109	3.73	0.9	0.6576	1	1	1436.81	22.2482
	Pulmonary Fascicle		8010.45	0.00801045	366.642	0.366642	-12600	1801	77.9189	0.0779189	150.725	0.150725	0.517	0.67	4.1	0.75	0.4489	0.9978	0.9866	1106.79	16.4931
	Pulmonary Fascicle		4410.22	0.00441022	260.111	0.260111	-12600	1801	60.3703	0.0603703	101.474	0.101474	0.5949	0.7385	3.92	0.82	0.5453	0.9998	0.9958	785.201	16.0683
	Pulmonary Fascicle		30285.3	0.0302853	646.186	0.646186	-12600	1801	161.58	0.16158	243.381	0.243381	0.6639	0.8068	3.71	0.91	0.651	1	1	1950.65	26.7508
	Pulmonary Fascicle		24170.7	0.0241707	572.968	0.572968	-12600	1801	153.42	0.15342	210.016	0.210016	0.7305	0.8353	3.69	0.93	0.6977	1	0.9999	1729.62	22.2742
	Pulmonary Fascicle		22741.2	0.0227412	550.443	0.550443	-12600	1801	155.673	0.155673	189.054	0.189054	0.8234	0.9001	3.65	0.94	0.8101	1	1.0001	1661.63	20.6404
	Pulmonary Fascicle		26262.1	0.0262621	602.37	0.60237	-12600	1801	146.643	0.146643	225.569	0.225569	0.6501	0.8107	3.72	0.91	0.6572	1	1	1818.38	21.9017
	Pulmonary Fascicle		15509.9	0.0155099	504.519	0.504519	-12600	1801	96.8698	0.0968698	197.142	0.197142	0.4914	0.7128	4.05	0.77	0.5081	1	1.0001	1523	18.9687
	Mean Pulmonary Fascicle	11	16661.6	0.0166616	468.392	0.468392	-12600	1801	115.427	0.115427	175.003	0.175003	0.656936	0.795336	3.79909	0.875455	0.636318	0.999618	0.997555	1413.94	21.0202
	Standard Deviation		8953.44	0.00895344	133.411	0.133411	0	0	37.2116	0.0372116	47.8246	0.0478246	0.0940804	0.0643579	0.152804	0.0648635	0.100288	0.000701168	0.00430473	402.73	4.93958
	Merged Fascicle (P and RL)		16131.6	0.0161316	476.803	0.476803	-12600	1801	124.938	0.124938	173.832	0.173832	0.7187	0.8245	3.75	0.89	0.6797	0.9907	0.9869	1743.47	26.8763
	Merged Fascicle (P and RL)		11137.7	0.0111377	404.618	0.404618	-12600	1801	105.65	0.10565	153.14	0.15314	0.6899	0.7776	3.83	0.85	0.6047	0.9859	0.976	1479.52	21.8813
	Merged Fascicle (P and RL)		13557.8	0.0135578	426.994	0.426994	-12600	1801	126.972	0.126972	146.126	0.146126	0.8689	0.8991	3.67	0.93	0.8084	0.9953	0.9927	1561.34	27.6198
	Merged Fascicle (P and RL)		16606.3	0.0166063	485.06	0.48506	-12600	1801	127.981	0.127981	179.917	0.179917	0.7113	0.8082	3.76	0.89	0.6532	0.9979	0.9865	1773.66	33.0715
	Merged Fascicle (P and RL)		16285.4	0.0162854	485.989	0.485989	-12600	1801	117.011	0.117011	180.622	0.180622	0.6478	0.7972	3.81	0.87	0.6356	0.9961	0.9887	1777.06	39.0721
	Mean Merged Fascicle	5	14743.8	0.0147438	455.893	0.455893	-12600	1801	120.51	0.12051	166.727	0.166727	0.72732	0.82132	3.764	0.886	0.67632	0.99318	0.98616	1667.01	29.7042
	Standard Deviation		2354.89	0.00235489	37.6098	0.0376098	0	0	9.35728	0.00935728	16.0197	0.0160197	0.0838146	0.0467044	0.0622896	0.0296648	0.0787061	0.00485922	0.00618692	137.523	6.56955
	vagus nerve		2008900	2.0089	5719.23	5.71923	-12600	1801	1346.38	1.34638	2269.54	2.26954	0.5932	0.7047	4.04	0.77	0.4966	0.985	0.9538	20912.8	209.546
	Superior cardiac branch
	Contour Name	Fascicle Count	Area (µm²)	Area (mm²)	Perimeter (µm)	Perimeter (mm)	Z position (µm)	Z plane	Feret Min (µm)	Feret Min (mm)	Feret Max (µm)	Feret Max (mm)	Aspect Ratio	Compactness	Shape Factor	Form Factor	Roundness	Convexity	Solidity	Area error coeff.	Perimeter error coef
	Cardiac Branch		144642	0.144642	1609.23	1.60923	-6307	902	277.347	0.277347	676.177	0.676177	0.4102	0.6347	4.23	0.7	0.4028	0.9961	0.9778	6463.67	117.743
	Cardiac Fascicle		22449.3	0.0224493	548.84	0.54884	-6307	902	158.965	0.158965	183.186	0.183186	0.8678	0.9229	3.66	0.94	0.8518	0.996	0.9904	2204.48	27.9355
	Cardiac Fascicle		6235.5	0.0062355	305.95	0.30595	-6307	902	80.3323	0.0803323	105.432	0.105432	0.7619	0.8451	3.87	0.84	0.7142	0.9854	0.982	1228.88	22.4355
	Mean Cardiac Fascicle	2	14342.4	0.0143424	427.395	0.427395	-6307	902	119.649	0.119649	144.309	0.144309	0.81485	0.884	3.765	0.89	0.783	0.9907	0.9862	1716.68	25.1855
	Standard Deviation		11464.9	0.0114649	171.749	0.171749	0	0	55.6017	0.0556017	54.9806	0.0549806	0.0748826	0.0550129	0.148492	0.0707107	0.0972979	0.00749533	0.0059397	689.85	3.88909
	Inferior cardiac branch
	Contour Name	Fascicle Count	Area (µm²)	Area (mm²)	Perimeter (µm)	Perimeter (mm)	Z position (µm)	Z plane	Feret Min (µm)	Feret Min (mm)	Feret Max (µm)	Feret Max (mm)	Aspect Ratio	Compactness	Shape Factor	Form Factor	Roundness	Convexity	Solidity	Area error coeff.	Perimeter error coef
	Cardiac Branch		120730	0.12073	1295.44	1.29544	-12607	1802	365.952	0.365952	461.601	0.461601	0.7928	0.8494	3.73	0.9	0.7214	0.9928	0.9893	1296.37	45.8452
	Cardiac Fascicle		27839	0.027839	617.098	0.617098	-12607	1802	166.146	0.166146	221.179	0.221179	0.7512	0.8512	3.7	0.92	0.7246	0.9996	0.9984	617.541	21.5616
	Mean Cardiac Fascicle	1	27839	0.027839	617.098	0.617098	-12607	1802	166.146	0.166146	221.179	0.221179	0.7512	0.8512	3.7	0.92	0.7246	0.9996	0.9984	617.541	21.5616
	Recurrent laryngeal
	Contour Name	Fascicle Count	Area (µm²)	Area (mm²)	Perimeter (µm)	Perimeter (mm)	Z position (µm)	Z plane	Feret Min (µm)	Feret Min (mm)	Feret Max (µm)	Feret Max (mm)	Aspect Ratio	Compactness	Shape Factor	Form Factor	Roundness	Convexity	Solidity	Area error coeff.	Perimeter error coef
	Recurrent Laryngeal Branch		399281	0.399281	2323.39	2.32339	-1400	201	593.452	0.593452	850.557	0.850557	0.6977	0.8383	3.68	0.93	0.7027	0.9981	0.9946	8320.84	97.1539
	Recurrent Laryngeal Fascicle		20804.5	0.0208045	538.898	0.538898	-1400	201	139.68	0.13968	195.399	0.195399	0.7148	0.8329	3.74	0.9	0.6938	0.9985	0.9966	1929.98	21.4292
	Recurrent Laryngeal Fascicle		14422.6	0.0144226	442.296	0.442296	-1400	201	120.707	0.120707	162.148	0.162148	0.7444	0.8357	3.68	0.93	0.6984	1	1	1584.01	25.083
	Recurrent Laryngeal Fascicle		15192.9	0.0151929	458.465	0.458465	-1400	201	121.136	0.121136	166.647	0.166647	0.7269	0.8346	3.72	0.91	0.6966	1	0.9993	1641.92	30.6157
	Recurrent Laryngeal Fascicle		10093.5	0.0100935	428.172	0.428172	-1400	201	88.0902	0.0880902	174.048	0.174048	0.5061	0.6513	4.26	0.69	0.4242	0.97	0.969	1533.43	37.3163
	Recurrent Laryngeal Fascicle		12069.4	0.0120694	414.682	0.414682	-1400	201	115.595	0.115595	141.902	0.141902	0.8146	0.8736	3.77	0.88	0.7632	0.991	0.9762	1485.12	30.6512
	Recurrent Laryngeal Fascicle		10581.5	0.0105815	384.12	0.38412	-1400	201	109.815	0.109815	135.382	0.135382	0.8112	0.8574	3.73	0.9	0.7351	0.9966	0.9957	1375.66	21.4258
	Recurrent Laryngeal Fascicle		13826.6	0.0138266	495.493	0.495493	-1400	201	91.1726	0.0911726	196.19	0.19619	0.4647	0.6763	4.21	0.71	0.4574	0.9919	0.9269	1774.53	30.2454
	Recurrent Laryngeal Fascicle		16071.6	0.0160716	464.87	0.46487	-1400	201	128.93	0.12893	167.866	0.167866	0.7681	0.8522	3.67	0.93	0.7262	0.9989	0.9979	1664.86	27.5648
	Mean Recurrent Laryngeal Fascicle	8	14132.8	0.0141328	453.375	0.453375	-1400	201	114.391	0.114391	167.448	0.167448	0.69385	0.80175	3.8475	0.85625	0.649362	0.993362	0.9827	1623.69	28.0414
	Standard Deviation		3438.38	0.00343838	48.2517	0.0482517	0	0	17.6858	0.0176858	21.911	0.021911	0.13401	0.0865031	0.241646	0.0979705	0.131134	0.0100653	0.0253875	172.806	5.35572
	Pulmonary
	Contour Name	Fascicle Count	Area (µm²)	Area (mm²)	Perimeter (µm)	Perimeter (mm)	Z position (µm)	Z plane	Feret Min (µm)	Feret Min (mm)	Feret Max (µm)	Feret Max (mm)	Aspect Ratio	Compactness	Shape Factor	Form Factor	Roundness	Convexity	Solidity	Area error coeff.	Perimeter error coef
	Pulmonary Branch		146586	0.146586	1425.65	1.42565	-12600	1801	341.58	0.34158	536.191	0.536191	0.637	0.8057	3.72	0.91	0.6492	0.9994	0.9969	6956.74	90.3216
	Pulmonary Branch		55004.6	0.0550046	924.839	0.924839	-12600	1801	184.764	0.184764	354.912	0.354912	0.5206	0.7456	3.94	0.81	0.556	0.996	0.9872	4512.95	41.6491
	Pulmonary Fascicle		10548.2	0.0105482	394.977	0.394977	-12600	1801	96.0169	0.0960169	151.823	0.151823	0.6324	0.7633	3.85	0.85	0.5827	0.9964	0.9842	1927.37	40.1726
	Pulmonary Fascicle		10644	0.010644	385.932	0.385932	-12600	1801	110.692	0.110692	134.614	0.134614	0.8223	0.8648	3.74	0.9	0.7479	0.9954	0.9888	1883.23	26.3875
	Pulmonary Fascicle		11857.9	0.0118579	416.184	0.416184	-12600	1801	107.35	0.10735	159.839	0.159839	0.6716	0.7687	3.82	0.86	0.591	0.9934	0.9898	2030.86	26.6907
	Pulmonary Fascicle		12381.5	0.0123815	446.5	0.4465	-12600	1801	87.3938	0.0873938	175.938	0.175938	0.4967	0.7136	4.01	0.78	0.5093	0.9989	0.9924	2178.79	22.3872
	Mean Pulmonary Fascicle	4	11357.9	0.0113579	410.898	0.410898	-12600	1801	100.363	0.100363	155.553	0.155553	0.65575	0.7776	3.855	0.8475	0.607725	0.996025	0.9888	2005.06	28.9095
	Standard Deviation		906.095	0.000906095	26.9087	0.0269087	0	0	10.6865	0.0106865	17.188	0.017188	0.133956	0.0632022	0.113284	0.0499166	0.100403	0.00228674	0.0034215	131.306	7.76061

## Sheet: Between Nerves
	Averages per nerve												Averages per position or branch
	NERVE 1												SS Cuff
	SS cuff												Nerve	Contour Name	Fascicle Count	Area (µm²)	Area (mm²)	Perimeter (µm)	Perimeter (mm)	Feret Min (µm)	Feret Min (mm)	Feret Max (µm)	Feret Max (mm)
	Contour Name	Fascicle Count	Area (µm²)	Area (mm²)	Perimeter (µm)	Perimeter (mm)	Feret Min (µm)	Feret Min (mm)	Feret Max (µm)	Feret Max (mm)			1	Mean Cardiac Fascicle	2	60527.4	0.0605274	930.867	0.930867	225.853	0.225853	352.545	0.352545
	Mean Cardiac Fascicle	2	60527.4	0.0605274	930.867	0.930867	225.853	0.225853	352.545	0.352545			2		1	70447.8	0.0704478	1197.66	1.19766	182.957	0.182957	506.201	0.506201
	Standard Deviation		7623.88	0.00762388	83.6563	0.0836563	4.74849	0.00474849	39.4119	0.0394119			3		1	61587.4	0.0615874	944.689	0.000944689	249.983	0.249983	353.509	0.353509
	Mean Recurrent Laryngeal Fascicle	13	24707.4	0.0247074	574.184	0.574184	154.537	0.154537	207.88	0.20788			4		1	34647	0.034647	683.748	0.683748	193.902	0.193902	238.168	0.238168
	Standard Deviation		11249.1	0.0112491	122.518	0.122518	39.1167	0.0391167	39.1315	0.0391315			Mean		1.25	56802.4	0.0568024	939.242	0.703306	213.174	0.213174	362.606	0.362606
	Mean Pulmonary Fascicle	12	38634.3	0.0386343	706.551	0.706551	187.876	0.187876	250.433	0.250433			Std Dev		0.5	15425.4	0.0154254	209.888	0.513117	30.5511	0.0305511	109.982	0.109982
	Standard Deviation		20550.9	0.0205509	199.851	0.199851	54.2456	0.0542456	71.931	0.071931			1	Mean Recurrent Laryngeal Fascicle	13	24707.4	0.0247074	574.184	0.574184	154.537	0.154537	207.88	0.20788
	Mean Merged Fascicle	4	28647.2	0.0286473	638.186	0.638186	160.414	0.160414	233.976	0.233976			2		9	24111.9	0.0241119	549.066	0.549066	153.28	0.15328	191.013	0.191013
	Standard Deviation		7220.51	0.00722051	71.7102	0.0717102	27.8817	0.0278817	31.1804	0.0311804			3		11	22857.4	0.0228574	539.084	0.539084	136.653	0.136653	200.946	0.200946
	vagus nerve		4193720	4.19372	10601.7	10.6017	1815.69	1.81569	3892.98	3.89298			4		15	21990.6	0.0219906	541.493	0.541493	143.582	0.143582	197.147	0.197147
													Mean		12	23416.8	0.0234168	550.957	0.550957	147.013	0.147013	199.247	0.199247
	EIT cuff												Std Dev		2.58199	1224.17	0.00122417	16.0585	0.0160585	8.46544	0.00846544	7.06205	0.00706205
													1	Mean Pulmonary Fascicle	12	38634.3	0.0386343	706.551	0.706551	187.876	0.187876	250.433	0.250433
	Contour Name	Fascicle Count	Area (µm²)	Area (mm²)	Perimeter (µm)	Perimeter (mm)	Feret Min (µm)	Feret Min (mm)	Feret Max (µm)	Feret Max (mm)			2		26	19992.3	0.0199923	514.708	0.514708	140.269	0.140269	183.334	0.183334
	Mean Cardiac Fascicle	1	93496.1	0.0934961	1111.71	1.11171	304.966	0.304966	384.206	0.384206			3		16	16646.5	0.0166465	463.546	0.463546	128.725	0.128725	163.353	0.163353
	Mean Recurrent Laryngeal Fascicle	12	27928.5	0.0279285	588.531	0.588531	161.049	0.161049	210.999	0.210999			4		9	18751.8	0.0187518	498.487	0.498487	135.388	0.135388	176.319	0.176319
	Standard Deviation		20540	0.02054	199.831	0.199831	58.8864	0.0588864	68.8585	0.0688585			Mean		15.75	23506.2	0.0235062	545.823	0.545823	148.064	0.148064	193.36	0.19336
	Mean Pulmonary Fascicle	17	26459.5	0.0264595	565.119	0.565119	154.354	0.154354	199.004	0.199004			Std Dev		7.41058	10179.5	0.0101795	109.258	0.109258	26.9592	0.0269592	38.9387	0.0389387
	Standard Deviation		21796.6	0.0217966	226.799	0.226799	65.411	0.065411	73.1339	0.0731339			1	Mean Merged Fascicle	4	28647.2	0.0286473	638.186	0.638186	160.414	0.160414	233.976	0.233976
	Mean Merged Fascicle	4	17375.1	0.0173751	484.246	0.484246	123.214	0.123214	177.352	0.177352			2		4	26569.6	0.0265696	584.883	0.584883	166.869	0.166869	200.336	0.200336
	Standard Deviation		8668.62	0.00866862	111.694	0.111694	33.9837	0.0339837	33.4763	0.0334763			3		3	12422.2	0.0124222	344.634	0.344634	94.7683	0.0947683	121.324	0.121324
	vagus nerve		3137500	3.1375	6648.47	6.64847	1765.09	1.76509	2445.01	2.44501			4		2	74280.1	0.0742801	1008.98	1.00898	252.115	0.252115	380.116	0.380116
													Mean		3.25	35479.8	0.0354798	644.172	0.644172	168.542	0.168542	233.938	0.233938
	Superior cardiac												Std Dev		0.957427	26852.6	0.0268526	274.689	0.274689	64.5391	0.0645391	108.288	0.108288
													1	Vagus Nerve	31	4193720	4.19372	10601.7	10.6017	1815.69	1.81569	3892.98	3.89298
	Contour Name	Fascicle Count	Area (µm²)	Area (mm²)	Perimeter (µm)	Perimeter (mm)	Feret Min (µm)	Feret Min (mm)	Feret Max (µm)	Feret Max (mm)			2		40	3561300	3.5613	8660.91	8.66091	1817.66	1.81766	3434.62	3.43462
	Cardiac Branch		315484	0.315484	2165.05	2.16505	483.012	0.483012	852.925	0.852925			3		31	2815030	2.81503	6489.26	6.48926	1830.53	1.83053	2203.15	2.20315
	Mean Cardiac Fascicle	1	36898.9	0.0368989	701.503	0.701503	196.906	0.196906	249.616	0.249616			4		27	3447040	3.44704	7003.87	7.00387	1913.67	1.91367	2538.97	2.53897
													Mean		32.25	3.50427e+06	3.50427	8188.93	8.18893	1844.39	1.84439	3017.43	3.01743
	Inferior cardiac												Std Dev		5.5	564777	0.564777	1856.29	1.85629	46.6524	0.0466524	781.58	0.78158
	Contour Name	Fascicle Count	Area (µm²)	Area (mm²)	Perimeter (µm)	Perimeter (mm)	Feret Min (µm)	Feret Min (mm)	Feret Max (µm)	Feret Max (mm)			EIT Cuff
	Cardiac Branch		155191	0.155191	1529.78	1.52978	369.825	0.369825	615.547	0.615547
	Mean Cardiac Fascicle	1	38829.6	0.0388296	717.398	0.717398	198.69	0.19869	244.179	0.244179			Nerve	Contour Name	Fascicle Count	Area (µm²)	Area (mm²)	Perimeter (µm)	Perimeter (mm)	Feret Min (µm)	Feret Min (mm)	Feret Max (µm)	Feret Max (mm)
	Recurrent laryngeal												1	Mean Cardiac Fascicle	1	93496.1	0.0934961	1111.71	1.11171	304.966	0.304966	384.206	0.384206
													2		2	33833.6	0.0338335	672.289	0.672289	184.794	0.184794	236.401	0.236401
	Contour Name	Fascicle Count	Area (µm²)	Area (mm²)	Perimeter (µm)	Perimeter (mm)	Feret Min (µm)	Feret Min (mm)	Feret Max (µm)	Feret Max (mm)			3		2	25398.4	0.0253984	600.754	0.600754	140.136	0.140136	233.377	0.233377
	Recurrent Laryngeal Branch		206645	0.206645	1700.59	1.70059	428.457	0.428457	666.528	0.666528			4		1	20289.3	0.0202893	524.193	0.524193	151.958	0.151958	185.122	0.185122
	Mean Recurrent Laryngeal Fascicle	3	22122.2	0.0221222	558.712	0.558712	125.318	0.125318	214.567	0.214567			Mean		1.5	43254.3	0.0432544	727.237	0.727237	195.463	0.195463	259.776	0.259776
	Standard Deviation		11923.2	0.0119232	155.775	0.155775	43.2767	0.0432767	62.5992	0.0625992			Std Dev		0.57735	33956.9	0.0339569	263.353	0.263353	75.4068	0.0754068	86.2156	0.0862156
													1	Mean Recurrent Laryngeal Fascicle	12	27928.5	0.0279285	588.531	0.588531	161.049	0.161049	210.999	0.210999
	Pulmonary												2		10	20566.5	0.0205665	520.316	0.520316	137.489	0.137489	183.829	0.183829
													3		10	18141.5	0.0181415	488.64	0.48864	126.194	0.126194	181.304	0.181304
	Contour Name	Fascicle Count	Area (µm²)	Area (mm²)	Perimeter (µm)	Perimeter (mm)	Feret Min (µm)	Feret Min (mm)	Feret Max (µm)	Feret Max (mm)			4		12	15833	0.015833	452.252	0.452252	123.507	0.123507	162.171	0.162171
	Pulmonary Branch		352463	0.352463	2239.34	2.23934	648.435	0.648435	764.165	0.764165			Mean		11	20617.4	0.0206174	512.435	0.512435	137.06	0.13706	184.576	0.184576
	Mean Pulmonary Fascicle	3	5824.03	0.00582403	280.547	0.280547	68.8182	0.0688182	105.426	0.105426			Std Dev		1.1547	5243.27	0.00524327	57.8531	0.0578531	17.1018	0.0171018	20.0946	0.0200946
	Standard Deviation		3614.92	0.00361492	80.4835	0.0804835	24.1156	0.0241156	30.2644	0.0302644			1	Mean Pulmonary Fascicle	17	26459.5	0.0264595	565.119	0.565119	154.354	0.154354	199.004	0.199004
													2		11	31156.4	0.0311564	647.185	0.647185	170.023	0.170023	234.493	0.234493
													3		11	27085.6	0.0270856	590.225	0.590225	159.682	0.159682	212.004	0.212004
													4		11	16661.6	0.0166616	468.392	0.468392	115.427	0.115427	175.003	0.175003
	NERVE 2												Mean		12.5	25340.8	0.0253408	567.73	0.56773	149.871	0.149871	205.126	0.205126
													Std Dev		3	6149.42	0.00614942	74.5969	0.0745969	23.8669	0.0238669	24.8637	0.0248637
	SS cuff												1	Mean Merged Fascicle	4	17375.1	0.0173751	484.246	0.484246	123.214	0.123214	177.352	0.177352
													2		8	17662.6	0.0176626	494.353	0.494353	125.067	0.125067	181.59	0.18159
	Contour Name	Fascicle Count	Area (µm²)	Area (mm²)	Perimeter (µm)	Perimeter (mm)	Feret Min (µm)	Feret Min (mm)	Feret Max (µm)	Feret Max (mm)			3		0	0	0	0	0	0	0	0	0
	Mean Pulmonary Fascicle	26	19992.3	0.0199923	514.708	0.514708	140.269	0.140269	183.334	0.183334			4		5	14743.8	0.0147438	455.893	0.455893	120.51	0.12051	166.727	0.166727
	Standard Deviation		8698.43	0.00869843	110.943	0.110943	35.1701	0.0351701	38.9551	0.0389551			Mean		4.25	12445.4	0.0124454	358.623	0.358623	92.1979	0.0921979	131.417	0.131417
	Mean Recurrent Laryngeal Fascicle	9	24111.9	0.0241119	549.066	0.549066	153.28	0.15328	191.013	0.191013			Std Dev		3.30404	8400.22	0.00840022	239.636	0.239636	61.4938	0.0614938	87.8343	0.0878343
	Standard Deviation		15172	0.015172	176.858	0.176858	45.0364	0.0450364	64.2551	0.0642551			1	Vagus Nerve	34	3137500	3.1375	6648.47	6.64847	1765.09	1.76509	2445.01	2.44501
	Mean Cardiac Fascicle	1	70447.8	0.0704478	1197.66	1.19766	182.957	0.182957	506.201	0.506201			2		31	3736870	3.73687	9156.46	9.15646	1816.62	1.81662	3650.8	3.6508
	Mean Merged Fascicle	4	26569.6	0.0265696	584.883	0.584883	166.869	0.166869	200.336	0.200336			3		23	2159000	2.159	6281.01	6.28101	1470.08	1.47008	2354.13	2.35413
	Standard Deviation		16180.5	0.0161805	173.733	0.173733	57.1993	0.0571993	48.8684	0.0488684			4		29	2008900	2.0089	5719.23	5.71923	1346.38	1.34638	2269.54	2.26954
	vagus nerve		3561300	3.5613	8660.91	8.66091	1817.66	1.81766	3434.62	3.43462			Mean		29.25	2.76057e+06	2.76057	6951.29	6.95129	1599.54	1.59954	2679.87	2.67987
													Std Dev		4.64579	821002	0.821002	1518.96	1.51896	227.581	0.227581	651.238	0.651238
	EIT cuff
													Superior Cardiac Branch
	Contour Name	Fascicle Count	Area (µm²)	Area (mm²)	Perimeter (µm)	Perimeter (mm)	Feret Min (µm)	Feret Min (mm)	Feret Max (µm)	Feret Max (mm)
	Mean Cardiac Fascicle	2	33833.6	0.0338335	672.289	0.672289	184.794	0.184794	236.401	0.236401			Nerve	Contour Name	Fascicle Count	Area (µm²)	Area (mm²)	Perimeter (µm)	Perimeter (mm)	Feret Min (µm)	Feret Min (mm)	Feret Max (µm)	Feret Max (mm)
	Standard Deviation		16195.6	0.0161956	158.104	0.158104	69.5499	0.0695499	35.1058	0.0351058
	MeanPulmonary Fascicle	11	31156.4	0.0311564	647.185	0.647185	170.023	0.170023	234.493	0.234493			1	Mean Cardiac Branch		315484	0.315484	2165.05	2.16505	483.012	0.483012	852.925	0.852925
	Standard Deviation		11899.8	0.0118998	143.246	0.143246	39.6819	0.0396819	58.6121	0.0586121			2			130085	0.130085	1308.22	1.30822	366.677	0.366677	466.614	0.466614
	Mean Recurrent Laryngeal Fascicle	10	20566.5	0.0205665	520.316	0.520316	137.489	0.137489	183.829	0.183829			3			145327	0.145327	1434.24	1.43424	375.652	0.375652	505.643	0.505643
	Standard Deviation		10279.2	0.0102792	124.304	0.124304	38.7399	0.0387399	43.0463	0.0430463			4			144642	0.144642	1609.23	1.60923	277.347	0.277347	676.177	0.676177
	Mean Merged Fascicle	8	17662.6	0.0176626	494.353	0.494353	125.067	0.125067	181.59	0.18159			Mean			161732	0.161733	1449.07	1.44907	359.33	0.35933	539.636	0.539636
	Standard Deviation		8833.96	0.00883396	138.166	0.138166	38.1712	0.0381712	45.2912	0.0452912			Std Dev			109670	0.10967	531.237	0.531237	111.55	0.11155	221.5	0.2215
	vagus nerve		3736870	3.73687	9156.46	9.15646	1816.62	1.81662	3650.8	3.6508			1	Mean Cardiac Fascicle	1	36898.9	0.0368989	701.503	0.701503	196.906	0.196906	249.616	0.249616
													2		1	26900.3	0.0269003	623.59	0.62359	158.442	0.158442	226.75	0.22675
	Superior cardiac												3		1	19290.7	0.0192907	526.076	0.526076	122.835	0.122835	189.917	0.189917
													4		2	14342.4	0.0143424	427.395	0.427395	119.649	0.119649	144.309	0.144309
	Contour Name	Fascicle Count	Area (µm²)	Area (mm²)	Perimeter (µm)	Perimeter (mm)	Feret Min (µm)	Feret Min (mm)	Feret Max (µm)	Feret Max (mm)			Mean		1.25	24358.1	0.0243581	569.641	0.569641	149.458	0.149458	202.648	0.202648
	Cardiac Branch		130085	0.130085	1308.22	1.30822	366.677	0.366677	466.614	0.466614			Std Dev		0.5	9827.3	0.0098273	118.926	0.118926	36.1913	0.0361913	46.0162	0.0460162
	Mean Cardiac Fascicle	1	26900.3	0.0269003	623.59	0.62359	158.442	0.158442	226.75	0.22675
													Inferior Cardiac Branch
	Inferior cardiac
													Nerve	Contour Name	Fascicle Count	Area (µm²)	Area (mm²)	Perimeter (µm)	Perimeter (mm)	Feret Min (µm)	Feret Min (mm)	Feret Max (µm)	Feret Max (mm)
	Contour Name	Fascicle Count	Area (µm²)	Area (mm²)	Perimeter (µm)	Perimeter (mm)	Feret Min (µm)	Feret Min (mm)	Feret Max (µm)	Feret Max (mm)
	Cardiac Branch		134859	0.134859	1364.23	1.36423	360.887	0.360887	504.505	0.504505			1	Mean Cardiac Branch		155191	0.155191	1529.78	1.52978	369.825	0.369825	615.547	0.615547
	Mean Cardiac Fascicle	1	32004.9	0.0320049	675.001	0.675001	169.348	0.169348	258.008	0.258008			2			134859	0.134859	1364.23	1.36423	360.887	0.360887	504.505	0.504505
													3			56034	0.056034	888.757	0.888757	211.977	0.211977	333.361	0.333361
	Recurrent laryngeal												4			120730	0.12073	1295.44	1.29544	365.952	0.365952	461.601	0.461601
													Mean			116704	0.116704	1269.55	1.26955	327.16	0.32716	478.754	0.478754
	Contour Name	Fascicle Count	Area (µm²)	Area (mm²)	Perimeter (µm)	Perimeter (mm)	Feret Min (µm)	Feret Min (mm)	Feret Max (µm)	Feret Max (mm)			Std Dev			42848.2	0.0428482	272.25	0.27225	76.8758	0.0768758	116.631	0.116631
	Recurrent Laryngeal Branch		721671	0.721671	3096.05	3.09605	862.92	0.86292	1067.8	1.0678			1	Mean Cardiac Fascicle	1	38829.6	0.0388296	717.398	0.717398	198.69	0.19869	244.179	0.244179
	Mean Recurrent Laryngeal Fascicle	9	11366.2	0.0113662	402.08	0.40208	99.9696	0.0999696	151.406	0.151406			2		1	32004.9	0.0320049	675.001	0.675001	169.348	0.169348	258.008	0.258008
	Standard Deviation		5028.87	0.00502887	99.2505	0.0992505	22.5917	0.0225917	43.7933	0.0437933			3		1	11388.8	0.0113888	400.796	0.400796	97.2825	0.0972825	149.679	0.149679
													4		1	27839	0.027839	617.098	0.617098	166.146	0.166146	221.179	0.221179
	Pulmonary												Mean		1	27515.6	0.0275156	602.573	0.602573	157.867	0.157867	218.261	0.218261
													Std Dev		0	11666.7	0.0116667	140.66	0.14066	42.9627	0.0429627	48.179	0.048179
	Contour Name	Fascicle Count	Area (µm²)	Area (mm²)	Perimeter (µm)	Perimeter (mm)	Feret Min (µm)	Feret Min (mm)	Feret Max (µm)	Feret Max (mm)
	Pulmonary Branch		96612.9	0.0966129	1134.41	1.13441	297.176	0.297176	397.053	0.397053			Recurrent Laryngeal Branch
	Pulmonary Branch		435207	0.435207	2469.16	2.46916	632.422	0.632422	936.328	0.936328
	Mean Pulmonary Branch		265910	0.26591	1801.78	1.80178	464.799	0.464799	666.691	0.666691			Nerve	Contour Name	Fascicle Count	Area (µm²)	Area (mm²)	Perimeter (µm)	Perimeter (mm)	Feret Min (µm)	Feret Min (mm)	Feret Max (µm)	Feret Max (mm)
	Mean Pulmonary Fascicle	5	15305.2	0.0153052	404.045	0.404045	91.6033	0.0916033	159.127	0.159127
	Standard Deviation		22708.1	0.0227081	310.194	0.310194	59.4712	0.0594712	134.791	0.134791			1	Mean Recurrent Laryngeal Branch		206645	0.206645	1700.59	1.70059	428.457	0.428457	666.528	0.666528
													2			721671	0.721671	3096.05	3.09605	862.92	0.86292	1067.8	1.0678
													3			347462	0.347462	2230.51	2.23051	520.367	0.520367	868.972	0.868972
													4			399281	0.399281	2323.39	2.32339	593.452	0.593452	850.557	0.850557
	NERVE 3												Mean			418765	0.418765	2337.63	2.33763	601.299	0.601299	863.465	0.863465
													Std Dev			217724	0.217724	575.242	0.575242	187.022	0.187022	164.048	0.164048
	SS cuff												1	Mean Recurrent Laryngeal Fascicle	3	22122.2	0.0221222	558.712	0.558712	125.318	0.125318	214.567	0.214567
													2		9	11366.2	0.0113662	402.08	0.40208	99.9696	0.0999696	151.406	0.258008
	Contour Name	Fascicle Count	Area (µm²)	Area (mm²)	Perimeter (µm)	Perimeter (mm)	Feret Min (µm)	Feret Min (mm)	Feret Max (µm)	Feret Max (mm)			3		7	8993.62	0.00899362	361.55	0.36155	79.7108	0.0797108	138.976	0.138976
	Mean Recurrent Laryngeal Fascicle	11	22857.4	0.0228574	539.084	0.539084	136.653	0.136653	200.946	0.200946			4		8	14132.8	0.0141328	453.375	0.453375	114.391	0.114391	167.448	0.167448
	Standard Deviation		15355.7	0.0153557	164.684	0.164684	48.3292	0.0483292	57.155	0.057155			Mean		6.75	14153.7	0.0141537	443.929	0.443929	104.847	0.104847	168.099	0.19475
	Mean Pulmonary Fascicle	16	16646.5	0.0166465	463.546	0.463546	128.725	0.128725	163.353	0.163353			Std Dev		2.62996	5712.4	0.0057124	85.2485	0.0852485	19.7125	0.0197125	33.0984	0.052442
	Standard Deviation		7203.8	0.0072038	101.417	0.101417	29.1088	0.0291088	35.8367	0.0358367
	Mean Merged Fascicle	3	12422.2	0.0124222	344.634	0.344634	94.7683	0.0947683	121.324	0.121324			Pulmonary Branch
	Standard Deviation		2439.38	0.00243938	57.6835	0.0576835	5.61351	0.00561351	21.2139	0.0212139
	Mean Cardiac Fascicle	1	61587.4	0.0615874	944.689	0.000944689	249.983	0.249983	353.509	0.353509			Nerve	Contour Name	Fascicle Count	Area (µm²)	Area (mm²)	Perimeter (µm)	Perimeter (mm)	Feret Min (µm)	Feret Min (mm)	Feret Max (µm)	Feret Max (mm)
	vagus nerve		2815030	2.81503	6489.26	6.48926	1830.53	1.83053	2203.15	2.20315
													1	Mean Pulmonary Branch		352463	0.352463	2239.34	2.23934	648.435	0.648435	764.165	0.764165
	EIT cuff												2			265910	0.26591	1801.78	1.80178	464.799	0.464799	666.691	0.666691
													3			199696	0.199696	1772.62	1.77262	468.832	0.468832	611.694	0.611694
	Contour Name	Fascicle Count	Area (µm²)	Area (mm²)	Perimeter (µm)	Perimeter (mm)	Feret Min (µm)	Feret Min (mm)	Feret Max (µm)	Feret Max (mm)			4			100795	0.100795	1175.24	1.17524	263.172	0.263172	445.552	0.445552
	Mean Recurrent Laryngeal Fascicle	10	18141.5	0.0181415	488.64	0.48864	126.194	0.126194	181.304	0.181304			Mean			188800	0.1888	1583.22	1.58322	398.934	0.398934	574.646	0.574646
	Standard Deviation		8315.55	0.00831555	117.313	0.117313	27.2182	0.0272182	49.0025	0.0490025			Std Dev			83094.8	0.0830948	353.615	0.353615	117.591	0.117591	115.131	0.115131
	Mean Pulmonary Fascicle	11	27085.6	0.0270856	590.225	0.590225	159.682	0.159682	212.004	0.212004			1	Mean Pulmonary Fascicle	3	5824.03	0.00582403	280.547	0.280547	68.8182	0.0688182	105.426	0.105426
	Standard Deviation		14552.1	0.0145521	151.521	0.151521	41.2763	0.0412763	55.4712	0.0554712			2		5	15305.2	0.0153052	404.045	0.404045	91.6033	0.0916033	159.127	0.159127
	Mean Cardiac Fascicle	2	25398.4	0.0253984	600.754	0.600754	140.136	0.140136	233.377	0.233377			3		6	35744.6	0.0357446	487.637	0.487637	114.159	0.114159	181.535	0.181535
	Standard Deviation		12960.9	0.0129609	166.637	0.166637	31.9642	0.0319642	69.3372	0.0693372			4		4	11357.9	0.0113579	410.898	0.410898	100.363	0.100363	155.553	0.155553
	vagus nerve		2159000	2.159	6281.01	6.28101	1470.08	1.47008	2354.13	2.35413			Mean		5	20802.6	0.0208026	434.193	0.434193	102.042	0.102042	165.405	0.165405
													Std Dev		1	13089.8	0.0130898	46.4099	0.0464099	11.3711	0.0113711	14.0825	0.0140825
	Superior cardiac branch
	Contour Name	Fascicle Count	Area (µm²)	Area (mm²)	Perimeter (µm)	Perimeter (mm)	Feret Min (µm)	Feret Min (mm)	Feret Max (µm)	Feret Max (mm)
	Cardiac Branch		145327	0.145327	1434.24	1.43424	375.652	0.375652	505.643	0.505643
	Mean Cardiac Fascicle	1	19290.7	0.0192907	526.076	0.526076	122.835	0.122835	189.917	0.189917
	Inferior cardiac branch
	Contour Name	Fascicle Count	Area (µm²)	Area (mm²)	Perimeter (µm)	Perimeter (mm)	Feret Min (µm)	Feret Min (mm)	Feret Max (µm)	Feret Max (mm)
	Cardiac Branch		56034	0.056034	888.757	0.888757	211.977	0.211977	333.361	0.333361
	Mean Cardiac Fascicle	1	11388.8	0.0113888	400.796	0.400796	97.2825	0.0972825	149.679	0.149679
	Recurrent laryngeal branch
	Contour Name	Fascicle Count	Area (µm²)	Area (mm²)	Perimeter (µm)	Perimeter (mm)	Feret Min (µm)	Feret Min (mm)	Feret Max (µm)	Feret Max (mm)
	Recurrent Laryngeal Branch		347462	0.347462	2230.51	2.23051	520.367	0.520367	868.972	0.868972
	Mean Recurrent Laryngeal Fascicle	7	8993.62	0.00899362	361.55	0.36155	79.7108	0.0797108	138.976	0.138976
	Standard Deviation		4465.13	0.00446513	103.272	0.103272	17.948	0.017948	45.6897	0.0456897
	Pulmonary branch
	Contour Name	Fascicle Count	Area (µm²)	Area (mm²)	Perimeter (µm)	Perimeter (mm)	Feret Min (µm)	Feret Min (mm)	Feret Max (µm)	Feret Max (mm)
	Pulmonary Branch		199696	0.199696	1772.62	1.77262	468.832	0.468832	611.694	0.611694
	Mean Pulmonary Fascicle	6	35744.6	0.0357446	487.637	0.487637	114.159	0.114159	181.535	0.181535
	Standard Deviation		1362.23	0.00136223	84.9057	0.0849057	11.0953	0.0110953	41.6155	0.0416155
	NERVE 4
	SS cuff
	Contour Name	Fascicle Count	Area (µm²)	Area (mm²)	Perimeter (µm)	Perimeter (mm)	Feret Min (µm)	Feret Min (mm)	Feret Max (µm)	Feret Max (mm)
	Mean Cardiac Fascicle	1	34647	0.034647	683.748	0.683748	193.902	0.193902	238.168	0.238168
	Mean Pulmonary Fascicle	9	18751.8	0.0187518	498.487	0.498487	135.388	0.135388	176.319	0.176319
	Standard Deviation		6761.4	0.0067614	95.2472	0.0952472	25.815	0.025815	35.9377	0.0359377
	Mean Recurrent Laryngeal Fascicle	15	21990.6	0.0219906	541.493	0.541493	143.582	0.143582	197.147	0.197147
	Standard Deviation		8278.24	0.00827824	102.43	0.10243	25.5249	0.0255249	42.8678	0.0428678
	Mean Merged Fascicle	2	74280.1	0.0742801	1008.98	1.00898	252.115	0.252115	380.116	0.380116
	Standard Deviation		14351.1	0.0143511	105.502	0.105502	22.9543	0.0229543	53.7477	0.0537477
	vagus nerve		3447040	3.44704	7003.87	7.00387	1913.67	1.91367	2538.97	2.53897
	EIT cuff
	Contour Name	Fascicle Count	Area (µm²)	Area (mm²)	Perimeter (µm)	Perimeter (mm)	Feret Min (µm)	Feret Min (mm)	Feret Max (µm)	Feret Max (mm)
	Mean Cardiac Fascicle	1	20289.3	0.0202893	524.193	0.524193	151.958	0.151958	185.122	0.185122
	Mean Recurrent Laryngeal Fascicle	12	15833	0.015833	452.252	0.452252	123.507	0.123507	162.171	0.162171
	Standard Deviation		7771.07	0.00777107	107.254	0.107254	31.1323	0.0311323	37.429	0.037429
	Mean Pulmonary Fascicle	11	16661.6	0.0166616	468.392	0.468392	115.427	0.115427	175.003	0.175003
	Standard Deviation		8953.44	0.00895344	133.411	0.133411	37.2116	0.0372116	47.8246	0.0478246
	Mean Merged Fascicle	5	14743.8	0.0147438	455.893	0.455893	120.51	0.12051	166.727	0.166727
	Standard Deviation		2354.89	0.00235489	37.6098	0.0376098	9.35728	0.00935728	16.0197	0.0160197
	vagus nerve		2008900	2.0089	5719.23	5.71923	1346.38	1.34638	2269.54	2.26954
	Superior cardiac branch
	Contour Name	Fascicle Count	Area (µm²)	Area (mm²)	Perimeter (µm)	Perimeter (mm)	Feret Min (µm)	Feret Min (mm)	Feret Max (µm)	Feret Max (mm)
	Cardiac Branch		144642	0.144642	1609.23	1.60923	277.347	0.277347	676.177	0.676177
	Mean Cardiac Fascicle	2	14342.4	0.0143424	427.395	0.427395	119.649	0.119649	144.309	0.144309
	Standard Deviation		11464.9	0.0114649	171.749	0.171749	55.6017	0.0556017	54.9806	0.0549806
	Inferior cardiac branch
	Contour Name	Fascicle Count	Area (µm²)	Area (mm²)	Perimeter (µm)	Perimeter (mm)	Feret Min (µm)	Feret Min (mm)	Feret Max (µm)	Feret Max (mm)
	Cardiac Branch		120730	0.12073	1295.44	1.29544	365.952	0.365952	461.601	0.461601
	Mean Cardiac Fascicle	1	27839	0.027839	617.098	0.617098	166.146	0.166146	221.179	0.221179
	Recurrent laryngeal
	Contour Name	Fascicle Count	Area (µm²)	Area (mm²)	Perimeter (µm)	Perimeter (mm)	Feret Min (µm)	Feret Min (mm)	Feret Max (µm)	Feret Max (mm)
	Recurrent Laryngeal Branch		399281	0.399281	2323.39	2.32339	593.452	0.593452	850.557	0.850557
	Mean Recurrent Laryngeal Fascicle	8	14132.8	0.0141328	453.375	0.453375	114.391	0.114391	167.448	0.167448
	Standard Deviation		3438.38	0.00343838	48.2517	0.0482517	17.6858	0.0176858	21.911	0.021911
	Pulmonary
	Contour Name	Fascicle Count	Area (µm²)	Area (mm²)	Perimeter (µm)	Perimeter (mm)	Feret Min (µm)	Feret Min (mm)	Feret Max (µm)	Feret Max (mm)
	Pulmonary Branch		146586	0.146586	1425.65	1.42565	341.58	0.34158	536.191	0.536191
	Pulmonary Branch		55004.6	0.0550046	924.839	0.924839	184.764	0.184764	354.912	0.354912
	Mean Pulmonary Branch		100795	0.100795	1175.24	1.17524	263.172	0.263172	445.552	0.445552
	Mean Pulmonary Fascicle	4	11357.9	0.0113579	410.898	0.410898	100.363	0.100363	155.553	0.155553
	Standard Deviation		906.095	0.000906095	26.9087	0.0269087	10.6865	0.0106865	17.188	0.017188
